1 **Title: Alveolar macrophages up-regulate a non-classical innate response**

2 **to *Mycobacterium tuberculosis* infection *in vivo***

3

4 **Authors:** A. C. Rothchild<sup>1</sup>, G. S. Olson<sup>1,2</sup>, J. Nemeth<sup>1,3</sup>, L. M. Amon<sup>1,4</sup>, D. Mai<sup>1</sup>, E. S.  
5 Gold<sup>1</sup>, A. H. Diercks<sup>1</sup>, A. Aderem<sup>1\*</sup>

6 **Affiliations:**

7 <sup>1</sup>Seattle Children's Research Institute, Center for Global Infectious Disease Research,  
8 Seattle, WA 98109.

9 <sup>2</sup>Medical Scientist Training Program, University of Washington School of Medicine,  
10 Seattle, WA 98195.

11 <sup>3</sup>Current address: University Hospital Zurich, University of Zurich, Division of Infectious  
12 Diseases and Hospital Epidemiology, Raemistrasse 100, 8091 Zürich,  
13 Switzerland.

14 <sup>4</sup>Current address: Universal Cells, Seattle, WA 98121.

15 \*Corresponding author: Alan Aderem, PhD, [alan.aderem@seattlechildrens.org](mailto:alan.aderem@seattlechildrens.org)

16 **One Sentence Summary:** In response to Mtb infection *in vivo*, alveolar macrophages  
17 fail to up-regulate the canonical pro-inflammatory innate response and instead induce  
18 an Nrf2-dependent cell protective transcriptional program, which in turn impairs the  
19 host's control of bacterial growth.

20

21 **Abstract:** Alveolar macrophages (AMs) are the first cells to be infected during  
22 *Mycobacterium tuberculosis* (Mtb) infection. Thus the AM response to infection is the  
23 first of many steps leading to initiation of the adaptive immune response, which is  
24 required for efficient control of infection. A hallmark of Mtb infection is the delay of the  
25 adaptive response, yet the mechanisms responsible for this delay are largely unknown.  
26 We developed a system to identify, sort and analyze Mtb-infected AMs from the lung  
27 within the first 10 days of infection. In contrast to what has been previously described  
28 using *in vitro* systems, we find that Mtb-infected AMs up-regulate a cell-protective  
29 antioxidant transcriptional signature that is dependent on the lung environment and not  
30 dependent on bacterial virulence. Computational approaches including pathway  
31 analysis and transcription factor binding motif enrichment analysis identify Nrf2 as a  
32 master regulator of the response of AMs to Mtb infection. Using knock-out mouse  
33 models, we demonstrate that Nrf2 drives the expression of the cell protective  
34 transcriptional program and impairs the ability of the host to control bacterial growth  
35 over the first 10 days of infection. Mtb-infected AMs exhibit a highly delayed pro-  
36 inflammatory response, and comparisons with uninfected AMs from the same infected  
37 animals demonstrate that inflammatory signals in the lung environment are blocked in  
38 the Mtb-infected cells. Thus, we have identified a novel lung-specific transcriptional  
39 response to Mtb infection that impedes AMs from responding rapidly to intracellular  
40 infection and thereby hinders the overall immune response.

## 41 **Introduction**

42           Transmission of *Mycobacterium tuberculosis* (Mtb), the deadliest infectious  
43 pathogen worldwide, generally occurs via aerosols expelled by cough from an infected  
44 person. Although inhaled Mtb is rapidly engulfed by alveolar macrophages (AMs) in the  
45 lung (1), mobilization of a robust immune response is significantly delayed, which is  
46 thought to contribute to disease progression. In animal models, recruitment of innate  
47 cells such as neutrophils and monocytes to the lung and T cell priming in the draining  
48 mediastinal lymph nodes does not occur until 11-14 days following infection, by which  
49 time the bacteria have replicated nearly 1,000-fold in the lung (1-5). The mechanisms  
50 that restrain or subvert the host response in the lung immediately following infection  
51 remain largely unknown.

52           AMs are the first cells in the lung to be infected with Mtb after aerosol  
53 transmission (1). Originating from fetal monocytes, AMs are the largest resident  
54 macrophage population in the lung and are situated within individual alveoli between the  
55 airway and underlying Type I alveolar epithelial cells (6). AMs serve as pulmonary  
56 immune sentinels, constantly sampling the airway for foreign particles. In addition, AMs  
57 perform a critical homeostatic role clearing inhaled material from the airway and  
58 recycling pulmonary surfactant. Therefore, AMs must be able to uncouple phagocytic  
59 functions from inflammatory responses (7, 8). In the absence of functional AMs, both  
60 mice and humans suffer from a form of pulmonary inflammation known as pulmonary  
61 alveolar proteinosis (PAP), caused by the buildup of pulmonary surfactant (9). Due to  
62 these steady-state functions, AMs express unique transcriptional and epigenetic profiles  
63 that are highly distinct from those of other tissue-resident macrophages (10-12).

64           Similar to other macrophage populations that are constantly exposed to  
65 environmental stimuli, AMs express a number of inhibitory receptors that have been  
66 shown to dampen their responses. However, under conditions such as acute lung injury,  
67 AMs can become highly activated and release damaging levels of pro-inflammatory  
68 mediators that contribute to airway disease (6). During other pulmonary infections such  
69 as influenza, in which AMs serve as secondary or tertiary responders, AMs exhibit pro-  
70 inflammatory transcriptional responses and can serve as an immunotherapy target to  
71 limit inflammation (13, 14). However, the AM response is likely influenced by cytokines  
72 released into the pulmonary environment by other cell types during these infections.

73           Unlike most pulmonary infections, the initial infectious dose of Mtb is very low  
74 and for the first several days AMs are the only cells infected with the bacteria.  
75 Therefore, Mtb infection provides an opportunity to assess the ability of AMs to respond  
76 to direct intracellular infection rather than environmental cues. Results from two recent  
77 studies provide hints that the response of AMs to Mtb might be suboptimal: At two  
78 weeks following infection, when Mtb can be found in multiple cell populations, AMs were  
79 significantly less effective at controlling bacterial replication than interstitial  
80 macrophages, another macrophage subset found in the lung (15); and AMs facilitated  
81 relocalization of the bacteria from the airway into the lung interstitium (1).

82           Due to the paucity of Mtb-infected AMs during the first few days following aerosol  
83 challenge, their presumed immediate response to the bacteria has been extrapolated  
84 from *in vitro* culture systems using models such as bone marrow derived macrophages  
85 (BMDMs). These studies have identified numerous sensing pathways and cytokine  
86 responses including TNF, Type I IFN, and IL-1 $\beta$  (16-21) that have been shown to play

87 crucial roles in host immunity in both animal and human studies (22). However,  
88 experiments using knock-out mice have demonstrated that these mediators do not  
89 affect the course of disease during the first week of infection *in vivo* (23-25), despite the  
90 fact that they are up-regulated within hours by Mtb-infected macrophages *in vitro*.

91 In order to more precisely define the response of AMs to Mtb *in vivo*, we  
92 developed an infection model and isolation procedure that yields sufficient numbers of  
93 infected AMs to perform global systems-level analyses at any point within the first 10  
94 days following infection. Our results demonstrate that the up-regulation of genes  
95 normally associated with the macrophage response to Mtb *in vitro* is highly delayed in  
96 AMs infected *in vivo*. Immediately following *in vivo* infection, AMs up-regulate a cell-  
97 protective antioxidant transcriptional program regulated by the transcription factor, Nrf2.  
98 Activation of this program is dependent on the lung microenvironment and shapes the  
99 course of disease. In the absence of Nrf2, AMs have an enhanced ability to control  
100 bacterial growth through the first 10 days of infection.

101

## 102 **Results**

### 103 **Alveolar macrophages are the first cells infected by Mtb in the lung**

104 In a standard low-dose Mtb aerosol challenge model, mice are infected with ~100  
105 CFU, which, due to the low replication rate of the bacteria, does not allow for the  
106 isolation of sufficient numbers of Mtb-infected cells from a reasonable number of  
107 animals for analysis. Therefore, we developed a high-dose model in which mice are  
108 infected with  $2 - 4 \times 10^3$  CFU of an mEmerald-expressing H37Rv strain of Mtb. We  
109 analyzed the population of infected cells in the lung over the first two weeks using this  
110 model and found that the vast majority of infected cells early on were AMs with  
111 significant numbers of infected neutrophils (PMN) and monocytes-derived macrophages  
112 (MDMs) appearing between day 10 and 14 (**Fig 1A, S1**). The localization of the Mtb and  
113 the timing of recruitment of innate immune cells in the high-dose model is consistent  
114 with other studies that have used a low-dose model (1, 3), suggesting that the high-  
115 dose infection does not alter the initial immune response in the lung. At this dose, ~0.5-  
116 2% of AMs were infected (**Fig 1B**) and the total number of Mtb-infected AMs did not  
117 change significantly over the first 2 weeks. By day 14, the numbers of infected  
118 neutrophils and AMs were equivalent (**Fig 1C**).

119 We found that Mtb-infected AMs were enriched within bronchoalveolar lavage  
120 (BAL) samples compared to the total lung and used high-throughput microscopy to  
121 analyze BAL samples from mice following high-dose infection with mEmerald-H37Rv to  
122 quantify the number of bacteria in each infected cell. At 1 day post-infection,  $81.3 \pm$   
123  $1.8\%$  (mean  $\pm$  SEM) of infected AMs contained a single bacillus; by day 10 only  $13.2 \pm$   
124  $2.3\%$  (mean  $\pm$  SEM) of AMs contained a single bacillus, with  $58.4 \pm 6.1\%$  of AMs

125 containing 2-5 bacilli and  $28.4 \pm 3.8\%$  containing more than 5 bacilli (**Fig 1D**). These  
126 data demonstrate that AM serve as a replication niche for Mtb through the first 10 days  
127 infection, an observation that has been similarly described at 1 and 2 weeks following  
128 infection in other studies (1, 15).

129

### 130 **Mtb-infected alveolar macrophages up-regulate an Nrf2-associated antioxidant** 131 **response *in vivo***

132 To characterize the early macrophage transcriptional response to Mtb infection,  
133 we infected mice with  $2 - 4 \times 10^3$  CFU of mEmerald-H37Rv, and isolated AMs (CD45<sup>+</sup>,  
134 Zombie Violet<sup>-</sup>, CD3<sup>-</sup>/CD19<sup>-</sup>, Siglec-F<sup>+</sup>, CD11b<sup>mid</sup>, and CD64<sup>+</sup>) (26, 27) from BAL by  
135 fluorescence activated cell sorting (FACS) 24 hours following infection (**Fig S1**).  
136 Isolating AMs by BAL allowed the samples to be kept on ice throughout processing and  
137 sorting, eliminating the need for lengthy and harsh digestion of lung tissue. Three  
138 populations were sorted for analysis by RNA-seq: Mtb-infected AMs (mEmerald<sup>+</sup>),  
139 bystander AMs (mEmerald<sup>-</sup>), and AMs from naïve mice (**Fig 2A**).

140 At 24 hours post-infection, we identified 196 genes that were differentially  
141 expressed (DE) (average counts per million (CPM) > 1, |fold change| > 2, FDR < 0.01)  
142 between Mtb-infected AMs and naïve AMs (**Fig 2B**). No genes were differentially  
143 expressed between bystander AMs and naïve AMs at this stringency, indicating an  
144 absence of systemic changes to the lung 24 hours after infection.

145 To identify enriched pathways and potential transcriptional regulators, we  
146 analyzed the up-regulated (131) and down-regulated (65) genes independently using  
147 three complementary computational approaches. Ingenuity Pathway Analysis (IPA)

148 revealed that the up-regulated genes were significantly enriched for the “Nrf2-mediated  
149 oxidative stress response” pathway ( $p$ -value =  $10^{-11.3}$ ) (**Fig 2B** (*green squares*), **Fig 2C**).  
150 This pathway includes genes involved in a number of cell protective functions including:  
151 antioxidant production (*Nqo1*, *Cat*, *Prdx1*, *Txnrd1*), iron metabolism (*Hmox1*), and  
152 glutathione metabolism (*Gstm1*, *Gclm*, *Gsta3*) (28). We also searched for enriched  
153 transcription factor promoter binding motifs using HOMER (Hypergeometric  
154 Optimization of Motif EnRichment) (29). The top four enriched transcription factor  
155 binding motifs in the 131 up-regulated genes ( $q$ -value = 0.0006) were motifs for either  
156 Nrf2 or Bach1, which are known to compete for the same binding sites (30) (**Fig 2B**  
157 (*yellow squares*), **Fig 2D**). To validate these results, we used a published Nrf2 ChIP-  
158 Seq analysis of peritoneal macrophages that were stimulated with the Nrf2 agonist  
159 diethyl maleate (GSE75177) (31). 29% of the 131 up-regulated genes contained an Nrf2  
160 ChIP-Seq peak, compared to 1.5% of background genes. The difference in proportions  
161 is highly significant,  $\chi^2$  (1,  $N = 10,946$ ) = 531.21,  $p$ -value  $< 2.2e^{-16}$ ) (**Fig 2B**, (*orange*  
162 *squares*), **Fig 2E**). We validated the up-regulation of several of the Nrf2-associated  
163 genes by qPCR (**Fig 2F**). These results demonstrate that the transcription factor Nrf2 is  
164 associated with the up-regulated transcriptional signature in Mtb-infected AMs 24 hours  
165 after infection *in vivo*. A similar analysis of the down-regulated genes did not uncover  
166 any significantly enriched pathways or candidate transcriptional regulators.

167

168 **Mtb-infected alveolar macrophages do not up-regulate classical pro-inflammatory**  
169 **genes**



170 We also examined whether, in addition to Nrf2-associated genes, Mtb-infected  
171 AMs up-regulated classical pro-inflammatory genes that have been seen previously  
172 expressed by various macrophage subsets in response to Mtb including cytokines and  
173 chemokines (e.g. *Tnf*, *Il1b*, *Cxcl9*) (22), pro-inflammatory receptors, costimulatory  
174 molecules, and Fc receptors. Very few of these genes were significantly up-regulated by  
175 Mtb-infected AMs (**Fig. S2**). In contrast, several genes involved in glycolytic metabolism  
176 (*Hif1a*, *Pkm*, *Aldoa*) were significantly up-regulated by Mtb-infected AMs (32).

177

### 178 **Virulent Mtb is not required to activate the Nrf2-associated signature**

179 To determine whether the Nrf2-signature was specifically induced by virulent  
180 Mtb, we repeated the high-dose infections using an mEmerald-expressing strain of Mtb  
181 lacking the RD1 virulence locus ( $\Delta$ RD1-H37Rv) and using fluorescent 1 $\mu$ M carboxylate-  
182 coated latex beads (**Fig S3A, B**). Both the  $\Delta$ RD1-infected and bead-positive AMs  
183 displayed up-regulation of Nrf2-associated genes at 24 hours, although the magnitude  
184 of the fold change for some genes was smaller than for H37Rv-infected AMs (**Fig 3A**).  
185 Unlike *in vitro* models that have shown a role for the ESX-1 locus, contained within  
186 RD1, in regulating the type I IFN responses of macrophages to Mtb (16, 33, 34), there  
187 were very few significant differences between the transcriptional responses of H37Rv vs  
188  $\Delta$ RD1-infected AMs 24 hours after infection (**Fig 3B**). The Nrf2-mediated oxidative  
189 stress response was the most highly enriched pathway in  $\Delta$ RD1-infected AMs by IPA  
190 (**Table S1**). Based on the stringencies imposed on the 24 hour H37Rv-infected AMs, no  
191 genes were significantly changed in the bead-positive AMs and similarly no pathways  
192 were enriched by IPA (**Fig 3C, Table S1**). However, it is worth noting that within the

193 most changed genes (with a filtering criteria of FDR < 0.05, fold change > 1.5) Nrf2-  
194 associated genes showed the greatest enrichment. Overall, these data demonstrate  
195 that AMs up-regulate the Nrf2-associated signature as a response to virulent bacteria,  
196 avirulent bacteria, or inert beads, suggesting that it is a more general response by AMs  
197 to the uptake of particles. While it is not surprising that particle uptake leads to  
198 transcriptional changes, it is notable that infection with a virulent pathogen appears to  
199 induce no additional host response within the first day of infection, suggesting that  
200 classical pathogen sensing is deficient, inhibited, or delayed in AMs.

201

202 **Over the first 10 days of infection, expression of Nrf2-associated genes is**  
203 **sustained and expression of pro-inflammatory genes is delayed in Mtb-infected**  
204 **alveolar macrophages**

205 To characterize the kinetics of the AM response to Mtb infection, we extended  
206 our transcriptional analysis to include 4 additional time points: 0.5 (12 hours), 2, 4, and  
207 10 days post-infection. We identified 288 genes that were significantly up-regulated at  
208 one or more of these time points compared to naïve AMs (**Fig 4A**). Many of the 131  
209 genes up-regulated at 24 hours and associated with Nrf2 by either IPA, transcription  
210 factor motif analysis or ChIP-Seq analysis showed sustained expression through 10  
211 days of infection (**Fig 4A, top**). Furthermore, by IPA, the “Nrf2-mediated oxidative stress  
212 response” pathway was the most highly enriched pathway at all 5 timepoints (p-values:  
213  $10^{-5.3}$ - $10^{-10.1}$ ) (**Table S1**). HOMER analysis also pinpointed a Nrf2 motif as the most  
214 enriched transcription factor motif at 2, 4, and 10 days, and identified no enriched motif  
215 at 0.5 days (**Table S1**).

216           The kinetic analysis also identified a late pro-inflammatory response up-regulated  
217 in Mtb-infected AMs primarily at 10 days post-infection (**Fig 4A, bottom**). At 10 days  
218 post-infection, Mtb-infected AMs displayed significant up-regulation of genes in the  
219 TNFA signaling via NFkB Pathway as determined by Gene Set Enrichment Analysis  
220 (GSEA) compared to naïve AMs (NES = 1.8, FDR = 0.0013), a pathway not significantly  
221 enriched in Mtb-infected AMs 1 day following infection (**Fig 4B**). The ranked leading  
222 edge genes in this pathway reveal the changes in gene expression over time, including  
223 increases in expression of: *Il1a*, *Tnf*, *Rel*, *Relb*, *NFkb2*, *Ccl2*, *Bhlhe40*, and *Nfe2l2* (**Fig**  
224 **4C**). A number of pro-inflammatory cytokine and chemokine genes (*Tnf*, *Il1a*, *Cxcl2*,  
225 *Cxcl3*, *Ccl17*) are significantly up-regulated only in Mtb-infected AMs 10 days after  
226 infection (**Fig S4**).

227

#### 228 **Bystander AMs express a unique transcriptional signature 10 days after infection.**

229           To disentangle the responses to intracellular infection from the responses to the  
230 inflammatory milieu in the lung, we analyzed the transcriptomes of the bystander AMs  
231 (uninfected cells from infected animals) at 1 and 10 days post-infection. As described  
232 above, bystander AMs displayed no significant gene expression changes compared to  
233 naïve AMs at 1 day after infection (**Fig 5A**). In contrast, by 10 days after infection  
234 bystander AMs showed abundant changes in gene expression with a total of 205  
235 significantly changed genes (**Fig 5B**). 28 of these genes (highlighted in blue) were  
236 shared with the Mtb-infected AMs, while 177 of them (highlighted in red) were uniquely  
237 changed in bystander but not in Mtb-infected AMs. Another 200 genes (highlighted in  
238 purple) were differentially expressed only in Mtb-infected AMs. Comparison between

239 these sets of genes demonstrates that expression changes found only in Mtb-infected  
240 AMs are enriched for Nrf2-associated genes (**Fig 5D**), while expression changes found  
241 only in bystander AMs are enriched for other more inflammatory pathways (**Fig 5E**).  
242 These differences are confirmed by Ingenuity Pathway Analysis of the two datasets.  
243 While Nrf2-mediated oxidative stress response and PTEN signaling were more highly  
244 enriched in Mtb-infected AMs compared to bystander AMs, bystander AMs showed  
245 differential expression for genes in a number of other pathways including calcium  
246 signaling, NFAT regulation of the immune response, role of pattern recognition  
247 receptors in recognition of bacteria and viruses, and STAT3 pathway (**Fig 5F**).  
248 Enrichment of these pathways indicate that some of the inflammatory signals received  
249 by bystander cells appear to be blocked in infected cells 10 days after infection. Overall,  
250 these data suggest that over the first week and a half AMs respond directly to infection  
251 as well as to systemic changes in the lung environment and that these two signals may  
252 cross-regulate.

253

254 **Both cell-intrinsic and environmental factors shape the alveolar macrophage**  
255 **response to Mtb.**

256 To determine whether the AM response to Mtb is cell-intrinsic or environment-  
257 dependent, we compared the response of AMs infected *in vitro* to the *in vivo*  
258 measurements described above. We isolated AMs by BAL from naïve WT mice, allowed  
259 them to adhere for 18 hours, infected them with H37Rv, and measured their  
260 transcriptional response and ability to control bacterial growth. In parallel, we performed  
261 identical experiments with bone-marrow-derived macrophages (BMDMs), which have

262 been used extensively, including by our group, to investigate how macrophages  
263 respond to Mtb (35). Similar to their response to Mtb infection *in vivo*, AMs displayed  
264 little to no increase in pro-inflammatory gene expression (including *I11b*, *I16* and *Nos2*)  
265 after infection *in vitro*, while BMDMs greatly up-regulated these genes (**Fig 6A**). One  
266 notable exception was *Tnf*, which was significantly up-regulated by AMs in response to  
267 H37Rv infection *in vitro*. In contrast to AMs infected *in vivo*, AMs infected *in vitro* did not  
268 up-regulated Nrf2-associated genes (**Fig 6B**). Overall, AMs were more permissive to  
269 bacterial growth than BMDMs, leading to a significant increase in bacterial burden as  
270 measured by CFU 5 days after infection (**Fig 6C**). These results suggest that the  
271 inability of AMs to up-regulate pro-inflammatory genes in response to intracellular  
272 infection is cell-intrinsic, while the up-regulation of the Nrf2-associated pathway is  
273 dependent on signals from the lung microenvironment.

274

### 275 **Expression of Nrf2 impairs the ability of AMs to control bacterial growth**

276 Our computational analyses identified Nrf2 as a potential regulator of the *in vivo*  
277 AM response to Mtb-infection. To test this hypothesis, we isolated Mtb-infected AMs  
278 from Nrf2<sup>-/-</sup> mice 24 hours after infection with mEmerald-H37Rv and performed RNA-  
279 sequencing. The response of Nrf2<sup>-/-</sup> AMs was strongly attenuated compared to that of  
280 WT AMs and many of the genes exhibiting altered responses were associated with Nrf2  
281 by IPA, transcription factor motif analysis, or ChIP-Seq analysis (**Fig 7A**). No additional  
282 genes to those identified in WT AMs were differentially expressed in Nrf2<sup>-/-</sup> AMs (|fold  
283 change| > 2, FDR < 0.01) suggesting that Nrf2 does not act to restrain the  
284 transcriptional response in this setting, as has been reported previously (36).

285 Nrf2 functions as a master regulator of an antioxidant stress response and likely  
286 plays critical roles in many cell types. Our own flow cytometric analysis of *Nrf2*<sup>-/-</sup> mice  
287 indicated that the cellularity and activation state of immune cells in their lungs are  
288 altered (data not shown); therefore, we chose to evaluate the functional role of Nrf2 in  
289 AMs during Mtb infection by generating Nrf2 conditional knockout mice. While there is  
290 no model for AM-specific gene deletion, we utilized both *LysM*<sup>cre/+</sup> and *CD11c*<sup>cre/+</sup> strains  
291 that delete floxed genes in either macrophages and neutrophils or AMs and dendritic  
292 cells, respectively (37), in combination with an *Nrf2*<sup>floxed/floxed</sup> strain. These breedings  
293 generated the following conditional knockout models: *Nrf2*<sup>floxed/floxed</sup>; *LysM*<sup>cre/+</sup> (*Nrf2*<sup>fl</sup>  
294 *LysM*<sup>cre</sup>) and *Nrf2*<sup>floxed/floxed</sup>; *CD11c*<sup>cre/+</sup> (*Nrf2*<sup>fl</sup>*CD11c*<sup>cre</sup>). We confirmed the absence of  
295 Nrf2 protein in AMs in both strains by Western Blot (**Fig S5**). We examined the bacterial  
296 burden in these mice at 10 days post-infection, the latest time point at which the vast  
297 majority of bacteria are still within AMs and found that both conditional knock-out  
298 models had lower bacterial burdens than their *Nrf2*<sup>fl</sup> littermate controls (**Fig 7B**). At this  
299 time point, Mtb-infected AMs lacking Nrf2 expression were also more highly activated  
300 with up-regulation of MHC II surface expression and were more prone to cell death as  
301 measured by the viability dye Zombie Violet (**Fig 7C**). These results suggest that at  
302 least one mechanism by which Nrf2 impedes host control is by blocking the activation  
303 and cell death of Mtb-infected AMs, which might prevent bacteria from being taken up  
304 by more bactericidal cell types.

## 305 **Discussion**

306 We find that *in vivo* infection of AMs with live virulent mycobacteria does not  
307 produce the kind of pro-inflammatory response previously observed in other  
308 macrophage infection models. Our data suggest that the initial host response to Mtb  
309 infection is relatively anti-inflammatory and may contribute to the extended time required  
310 for antigen transport to the draining lymph node and subsequent T cell activation and  
311 adaptive immune control (2). Previous studies, including our own, have described Mtb-  
312 infected macrophages *in vitro* up-regulating pro-inflammatory genes primarily driven by  
313 NF- $\kappa$ B or type I IFN signaling (16, 18, 33, 35). Here we describe a unique Nrf2-driven  
314 transcriptional signature expressed in Mtb-infected AMs *in vivo*. While Nrf2 and several  
315 of its target genes, notably *Hmox1*, have been shown to be up-regulated during chronic  
316 Mtb infection in response to cellular and oxidative stress (38-40), our results suggest  
317 that the Nrf2 signature in AMs is likely a general response to phagocytic activity rather  
318 than to bacterial infection. The lack of an Mtb-specific immune response is surprising  
319 given that AMs express almost all of the canonical pathogen-sensing machinery  
320 required to detect Mtb infection (41). In the context of a meta-analysis of 32 studies  
321 covering 77 different host-pathogen interactions, this transcriptional response falls far  
322 outside the norm (42).

323 The fact that the Nrf2 transcriptional response has not been reported previously,  
324 despite numerous published studies of Mtb-infected macrophages, highlights the  
325 importance of using *in vivo* systems to dissect lung-specific immunological events (43).  
326 Our results suggest that established *in vitro* models do not adequately replicate the  
327 initial host response to Mtb. In addition, it is worth noting that our observations that

328 murine AMs become more pro-inflammatory over time in culture (data not shown) are in  
329 concordance with reports that the response of human AMs to Mtb infection evolves from  
330 a profile unique to AMs towards one that is more similar to that of monocytes the longer  
331 they are cultured *in vitro* (44).

332 Studies using Nrf2<sup>-/-</sup> mice have demonstrated both protective (*S. pneumoniae*, *S.*  
333 *aureus*, RSV, and *P. aeruginosa*) and harmful (*H. influenzae*, Marburg virus) roles for  
334 Nrf2 during infection (45-51). To evaluate the functional role of Nrf2 in AMs during Mtb  
335 infection, we chose to use two conditional knockout models (LysM<sup>cre</sup> and CD11c<sup>cre</sup>). Cre  
336 expression by these promoters also deletes Nrf2 in either neutrophils and MDMs (LysM)  
337 or dendritic cells (CD11c). However, during the first 10 days of infection following  
338 aerosol challenge Mtb almost exclusively infects AMs and therefore this approach  
339 interrogates the direct role of Nrf2 in Mtb-infected AMs early during infection.  
340 Conversely, beyond 10 days, significant numbers of neutrophils, MDMs and dendritic  
341 cells begin to participate in the response making it impossible to link the outcome of  
342 infection at later times directly to AMs. In fact, we observe divergent phenotypes in the  
343 Nrf2<sup>fl</sup>LysM<sup>cre</sup> and Nrf2<sup>fl</sup>CD11c<sup>cre</sup> strains at 14 and 28 days following infection (data not  
344 shown), which indicates unique roles for Nrf2 in other cell types participating in the  
345 immune response to Mtb-infection that will be the subject of future studies.

346 In addition to infection, lung injury caused by noncommunicable conditions such  
347 as chronic obstructive pulmonary disease (COPD), cigarette smoking, cystic fibrosis,  
348 and exposure to air pollution have all been shown to activate Nrf2 (52, 53). Therefore,  
349 the finding that Nrf2 expression hinders AMs from controlling intracellular pathogen



350 growth provides one potential mechanism by which smoking and indoor air pollution  
351 contribute to TB risk (54, 55).

352         The finding that AMs do not mount an inflammatory and bactericidal response to  
353 Mtb infection is supported by transcriptional profiling we performed in collaboration with  
354 Peterson et al on Mtb residing within infected AMs *in vivo* using a novel bead-based  
355 method, Path-Seq, to enrich for bacterial transcripts (under revision, *Molecular Systems*  
356 *Biology*) (56). These studies show that infection of AMs *in vivo* fails to induce the robust  
357 Mtb stress response that is observed after infection of BMDMs *in vitro*. Unlike infection  
358 of BMDMs, which causes Mtb to dynamically regulate mycolic acid biosynthesis and  
359 increase expression of regulators such as DosR that respond to environmental stress,  
360 infection of AMs leads to very few transcriptional changes. Targeting AMs may be one  
361 of Mtb's most important virulence strategies. In order to spread effectively via aerosol  
362 transmission of small numbers of bacteria, Mtb targets a macrophage subtype that is  
363 seemingly not activated by pathogen-sensing pathways and instead responds in a  
364 manner that safeguards against cellular damage. This unexpected cell-protective  
365 response provides one explanation for the puzzling observation, termed the  
366 "macrophage paradox" by Vance and Price, that intracellular pathogens often infect the  
367 very cell type bestowed with the effector functions to control pathogen growth (57). In  
368 addition, the observation that bystander AMs up-regulate several inflammatory  
369 pathways that are not expressed in Mtb-infected AMs from the same lung suggests that  
370 intracellular Mtb infection is impeding AMs from receiving or processing certain signals  
371 from the inflammatory environment. This suppression may be an active process by Mtb  
372 and warrants further study.

373           Given recent studies demonstrating that innate responses can be “trained” by  
374 prior exposure to stimuli such as BCG vaccination, influenza, or adenoviral infection  
375 (58-60), we wondered whether the initial AM response to Mtb could be similarly  
376 modified. Using a model of TB containment after intradermal infection that generates  
377 low-level inflammation in specific tissues, we are able to show that pre-exposure to low  
378 levels of cytokines allows AMs to mount a more robust and pro-inflammatory response  
379 to aerosol Mtb infection that is associated with enhanced protection (manuscript in  
380 preparation). These results indicate that the response of AMs can be beneficially  
381 modified by the inflammatory milieu. Traditional TB vaccine strategies generally aim to  
382 potentiate lung-homing Mtb-specific T cells during the first days of infection, yet our data  
383 suggest that to be effective during the first week, T cells would have to target infected  
384 macrophages that are essentially “hidden” as a consequence of up-regulating  
385 antioxidant rather than pro-inflammatory responses. We hypothesize that a dual  
386 platform that simultaneously generates T cell memory and “trains” AMs to be more  
387 inflammatory could be an effective vaccine strategy.

388           AMs express a number of inhibitory receptors at baseline that are thought to  
389 contribute to their immunoregulatory phenotype (6). We don’t yet understand how these  
390 other signaling pathways impact the AM response to Mtb or provide redundancy with  
391 the Nrf2 pathway. Our data suggest that Mtb-infected AMs undergo a shift towards an  
392 increasingly pro-inflammatory phenotype over the first 10 days of infection, but the  
393 underlying mechanisms and the subsequent events remain unknown. Is this change  
394 cell-intrinsic or dependent on uptake and recognition of bacteria by other cell types  
395 following AM cell death? Similarly, we don’t yet understand why a portion of the pro-

396 inflammatory program expressed in bystander AMs at 10 days post-infection is absent  
397 in infected AMs. Are there additional inhibitory mechanisms apart from Nrf2 that  
398 specifically restrain Mtb-infected AMs? Finally, we don't yet know how human AMs  
399 respond to Mtb upon initial infection *in vivo*. These studies were performed using mice  
400 living in specific-pathogen free facilities that are exposed to a very limited set of  
401 environmental factors, while humans are continuously exposed to a variety of airborne  
402 stimuli and pathogens that may alter the baseline state of AMs. How pre-exposure to  
403 different stimuli impacts human AM function, and therefore TB susceptibility, is not yet  
404 understood.

405       Here we show that AMs up-regulate an Nrf2-dependent cell protective  
406 transcriptional program in response to Mtb infection *in vivo* and fail to up-regulate  
407 canonical inflammatory pathways normally associated with intracellular infection and  
408 that this impairs the host's control of bacterial growth. Further investigation into the  
409 intervening events between initial AM infection and the adaptive T cell response as well  
410 as how the AM response to Mtb can be modified by environmental exposure may  
411 facilitate a better understanding of the early events of TB infection and inform novel TB  
412 vaccine strategies.

413

## 414 **Materials and Methods**

### 415 **Study Design**

416 The aim of this study was to measure the immune response of AMs to intracellular Mtb  
417 infection *in vivo*. We characterized the transcriptional profile of murine Mtb-infected  
418 alveolar macrophages after aerosol infection by sorting cells and performing low-input  
419 RNA-sequencing. To determine the effect of the transcription factor Nrf2 on the  
420 response of AMs, we generated Nrf2 conditional knock-out mouse models (Nrf2<sup>fl</sup>LysM<sup>cre</sup>  
421 and Nrf2<sup>fl</sup>Cd11c<sup>cre</sup>) and tested their responses against Nrf2<sup>fl</sup> littermate controls. The  
422 number of replicates for each experiment is indicated in the figure caption. No animals  
423 were excluded in these studies.

424

### 425 **Mice**

426 C57BL/6 and Nrf2<sup>-/-</sup> (B6.129X1-Nfe2l2<sup>tm1Ywk</sup>/J) mice were purchased from Jackson  
427 Laboratories (Bar Harbor, ME). Nrf2<sup>floxed</sup> (C57BL/6-Nfe2l2<sup>tm1.1Sred</sup>/SbisJ), CD11c<sup>cre</sup>  
428 (B6.Cg-Tg(Itgax-cre)1-1Reiz/J) and LysM<sup>cre</sup> (B6.129P2-Lyz2<sup>tm1(cre)fo</sup>/J) were purchased  
429 from Jackson Laboratories and bred to generate Nrf2<sup>fl</sup>CD11c<sup>cre</sup> and Nrf2<sup>fl</sup>LysM<sup>cre</sup> mice.  
430 Mice were housed and maintained in specific pathogen-free conditions at Seattle  
431 Children's Research Institute and experiments were performed in compliance with the  
432 Institutional Animal Care and Use Committee. 6-12 week old male and female mice  
433 were used for all experiments, except for RNA-sequencing, which used only female  
434 mice for uniformity. Mice infected with Mtb were housed in a Biosafety Level 3 facility in  
435 an Animal Biohazard Containment Suite.

436

### 437 ***M. tuberculosis* Aerosol Infections and Lung Mononuclear Cell Isolation**

438 Most aerosol infections were performed with a stock of wildtype H37Rv transformed  
439 with an mEmerald reporter pMV261 plasmid, generously provided by Dr. Chris Sasseti  
440 and Christina Baer (University of Massachusetts Medical School, Worcester, MA).  
441 Some infections used an Mtb strain with a deletion of the virulence determinant RD1  
442 region ( $\Delta$ RD1), provided by Dr. David Sherman (SCRI, Seattle, WA), and transformed  
443 with the same mEmerald expression plasmid. For both standard (~100 CFU) and high  
444 dose (~2,000-4,000 CFU) infections, mice were enclosed in an aerosol infection  
445 chamber (Glas-Col) and frozen stocks of bacteria were thawed and placed inside the  
446 associated nebulizer. To determine the infectious dose, three mice in each infection  
447 were sacrificed one day later and lung homogenates were plated onto 7H10 plates for  
448 CFU enumeration, as previously described (61).

449

### 450 **Bead aerosolization**

451 Carboxylate 1.0  $\mu$ m fluorescent beads (ThermoFisher) were aerosolized using a LC  
452 Sprint Resuable Nebulizer (PARI) attached to a vacuum pump and an air flow regulator  
453 as described previously (Schroeder WG, 2009, Biotechniques).

454

### 455 **Lung Single Cell Suspensions**

456 At each time point, lungs were removed and single-cell suspensions of lung  
457 mononuclear cells were prepared by Liberase Blendzyme 3 (70 ug/ml, Roche) digestion  
458 containing DNaseI (30  $\mu$ g/ml; Sigma-Aldrich) for 30 mins at 37°C and mechanical  
459 disruption using a gentleMACS dissociator (Miltenyi Biotec), followed by filtering through

460 a 70  $\mu$ M cell strainer. Cells were resuspended in FACS buffer (PBS, 1% FBS, and 0.1%  
461 NaN<sub>3</sub>) prior to staining for flow cytometry.

462

### 463 **Alveolar Macrophage Isolation**

464 Bronchoalveolar lavage was performed by exposing the trachea of euthanized mice,  
465 puncturing the trachea with Vannas Micro Scissors (VWR) and injecting 1 mL PBS  
466 using a 20G-1" IV catheter (McKesson) connected to a 1 mL syringe. The PBS was  
467 flushed into the lung and then aspirated three times and the recovered fluid was placed  
468 in a 15mL tube on ice. The wash was repeated 3 additional times. Cells were filtered  
469 and spun down. For antibody staining, cells were suspended in FACS buffer. For cell  
470 culture, cells were plated at a density of  $1 \times 10^5$  cells/well (96-well plate) in complete  
471 RPMI (RPMI plus FBS (10%, VWR), L-glutamine (2mM, Invitrogen), and Penicillin-  
472 Streptomycin (100 U/ml; Invitrogen) and allowed to adhere overnight in a 37°C  
473 humidified incubator (5% CO<sub>2</sub>). Media with antibiotics were washed out prior to infection  
474 with *M. tuberculosis*.

475

### 476 **Cell Sorting and Flow Cytometry**

477 Fc receptors were blocked with anti-CD16/32 (2.4G2, BD Pharmingen). Cell viability  
478 was assessed using Zombie Violet dye (Biolegend). Cells were suspended in 1X PBS  
479 (pH 7.4) containing 0.01% NaN<sub>3</sub> and 1% fetal bovine serum (i.e., FACS buffer). Surface  
480 staining included antibodies specific for murine: Siglec F (E50-2440, BD Pharmingen),  
481 CD11b (M1/70), CD64 (X54-5/7.1), CD45 (104), CD3 (17A2, eBiosciences), CD19  
482 (1D3, eBiosciences), CD11c (N418), I-A/I-E (M5/114.15.2), and Ly6G (1A8) (reagents

483 from Biolegend unless otherwise noted). Cell sorting was performed on a FACS Aria  
484 (BD Biosciences). Sorted cells were collected in complete media, spun down,  
485 resuspended in Trizol, and frozen at -80°C overnight prior to RNA isolation. Samples for  
486 flow cytometry were fixed in 2% paraformaldehyde solution in PBS and analyzed using  
487 a LSRII flow cytometer (BD Biosciences) and FlowJo software (Tree Star, Inc.).

488

### 489 **RNA-sequencing and Analysis**

490 RNA isolation was performed using TRIzol (Invitrogen), two sequential chloroform  
491 extractions, Glycoblue carrier (Thermo Fisher), isopropanol precipitation, and washes  
492 with 75% ethanol. RNA was quantified with the Bioanalyzer RNA 6000 Pico Kit  
493 (Agilent). Due to the low number of Mtb-infected cells recovered (~2,000-4,000 cells  
494 total after pooling BAL from 10-12 mice), all cDNA libraries were constructed and  
495 amplified using the SMARTer Stranded Total RNA-Seq Kit (v1 or v2) - Pico Input  
496 Mammalian (Clontech) per the manufacturer's instructions. Libraries were amplified and  
497 then sequenced on an Illumina NextSeq (2 x 75, paired-end). Stranded paired-end  
498 reads of length 76 were preprocessed: The first three nucleotides of R1 (v1 kit) or R2  
499 (v2 kit) were removed as described in the SMARTer Stranded Total RNA-Seq Kit - Pico  
500 Input Mammalian User Manual (v1: 112215, v2: 063017) and read ends consisting of 50  
501 or more of the same nucleotide were removed). The remaining read pairs were aligned  
502 to the mouse genome (mm10) + Mtb H37Rv genome using the gsnap aligner (v. 2016-  
503 08-24) allowing for novel splicing. Concordantly mapping read pairs (average 15-million  
504 / sample) that aligned uniquely were assigned to exons using the subRead program and  
505 gene definitions from Ensembl Mus\_Musculus GRCm38.78 coding and non-coding

506 genes. Only genes for which at least three samples had at least 10 counts and had an  
507 average CPM  $> 1.0$  were retained, resulting in a total of 10,946 genes. Differential  
508 expression was calculated using the edgeR package from bioconductor.org. False  
509 discovery rate was computed with the Benjamini-Hochberg algorithm (**Tables S2, S3**).  
510 Hierarchical clusterings were performed in R using 'TSclust' and 'hclust' libraries. Heat  
511 map and scatterplot visualizations were generated in R using the 'heatmap.2' and  
512 'ggplot2' libraries, respectively.

513

#### 514 **Ingenuity Pathway Analysis (IPA)**

515 IPA (QIAGEN) was used to identify enriched pathways for differentially expressed  
516 genes between naïve and Mtb-infected or naïve and bystander AMs (cut-off values:  
517  $FDR < 0.01$ ,  $|FC| > 2$ ) at various timepoints following infection. Canonical pathways with  
518 enrichment score  $-\log(p\text{-value}) \geq 5.0$  are reported. IPA was also used to identify  
519 differentially enriched pathways between bystander and Mtb-infected AMs at 10 days  
520 post-infection (cut-off values:  $FDR < 0.05$ ,  $|FC| > 2$ ). Canonical pathways with  $|z\text{-scores}|$   
521  $> 1$  and  $p\text{-values} < 0.05$  were reported.

522

#### 523 **Promoter Scanning (HOMER)**

524 Promoter regions of genes that were up-regulated ( $|FC| > 2$ ,  $FDR < 0.01$ ,  $\log_2(\text{average}$   
525  $\text{counts per million}) > 1.0$ ) were scanned for DNA protein-binding motif over-  
526 representation using the HOMER program (v4.9.1, [homer.salk.edu](http://homer.salk.edu)) (29). Promoter  
527 regions were defined as 2000 nucleotides upstream of the gene start to 1000  
528 nucleotides downstream. Background sequences were taken from the promoter regions



529 of expressed genes defined by Ensembl Mus\_Musculus GRCm38.78 (N=10,946). 402  
530 known motifs were scanned and hypergeometric p-values computed.

### 531 **Nrf2 ChIP-seq Analysis**

532 Fastq files from the GEO data set GSE75175 were downloaded for three Nrf2 ChIP-seq  
533 experiments assaying peritoneal macrophages from wild-type mice including the  
534 corresponding sequencing of input DNA (31). For each sample, single ended reads of  
535 length 101 were filtered to remove those consisting of 50 or more of the same  
536 nucleotide or of low-quality base calls. Filtered reads were aligned against mm10 using  
537 gsnap (v. 2011-11-20) with no allowance for splicing. Uniquely mapped reads were  
538 filtered for duplicates based on alignment position. A total of 3,975 peaks were called  
539 using MACS2 (v.2.1.0) for the combined ChIP-seq samples using the input DNA  
540 libraries as the controls. Called peaks were annotated by checking for overlap with  
541 promoter regions as described above.

542

### 543 **Gene Set Enrichment Analysis (GSEA)**

544 Input data for GSEA consisted of lists, ranked by  $-\log(p\text{-value})$ , comparing RNAseq  
545 expression measures of target samples and naïve controls including directionality of  
546 fold-change. Mouse orthologs of human Hallmark genes were defined using a list  
547 provided by Molecular Signatures Database (MSigDB) (62). GSEA software was used  
548 to calculate enrichment of ranked lists in each of the respective hallmark gene lists, as  
549 described previously (63). A nominal p-value for each ES is calculated based on the null  
550 distribution of 1,000 random permutations. To correct for multiple hypothesis testing, a  
551 normalized enrichment score (NES) is calculated that corrects the ES based on the null

552 distribution. A false-discovery rate (FDR) is calculated for each NES. Leading edge  
553 subsets are defined as the genes in a particular gene set that are part of the ranked list  
554 at or before the running sum reaches its maximum value.

555

### 556 **BMDM Isolation and Culture**

557 Bone marrow-derived macrophages (BMDMs) were cultured in complete RPMI with  
558 recombinant human CSF-1 (50 ng/ml; PeproTech Inc.) for 6 days. Media with  
559 antibiotics were washed out prior to infection with H37Rv and replaced with complete  
560 RPMI without antibiotics.

561

### 562 **Mtb *In Vitro* Culture and Infection**

563 H37Rv was grown in 7H9 media at 37°C to O.D. of 0.1-0.3. The final concentration was  
564 calculated based on strain titer and bacteria was added to macrophages at an effective  
565 multiplicity of infection (MOI) of 0.5 for two hours. Cultures were then washed three  
566 times to remove extracellular bacteria. Infected macrophages were cultured for up to 7  
567 days. For CFU measurement, cells were lysed with 1% Triton X-100/PBS and lysate  
568 from triplicate conditions were plated in serial dilutions on Middlebrook 7H10 agar plates  
569 (ThermoFisher Scientific) and cultured at 37°C for 21 days.

570

### 571 **qRT-PCR**

572 For gene expression analysis,  $1 \times 10^5$  AMs or BMDMs were plated in 96-well plates  
573 overnight, followed by *in vitro* infection as described above. RNA was isolated from cells  
574 using TRIzol (Invitrogen), two sequential chloroform extractions were performed,

575 Glycoblue (10  $\mu$ g; ThermoFisher) was added as a carrier, and RNA was precipitated  
576 with isopropanol and then washed with 75% ethanol. Quantitative PCR reactions were  
577 carried out using TaqMan primer probes (ABI) and TaqMan Fast Universal PCR Master  
578 Mix (ThermoFisher) in a CFX384 Touch Real-Time PCR Detection System (BioRad).  
579 Data were normalized by the level of EF1a expression in individual samples. Fold  
580 induction was computed with respect to the normalized expression levels of respective  
581 macrophages under unstimulated conditions within the same experiment.

582

### 583 **Microscopy**

584 Cells acquired by BAL were spun down and resuspended in complete RPMI without  
585 antibiotics and plated on a Lab-Tek II 8-chamber glass-bottom slide (Nunc). The slides  
586 were kept for 2 hours in a 37°C humidified incubator (5% CO<sub>2</sub>) to allow adherence  
587 before the media was removed and the cells were fixed with 2% paraformaldehyde in  
588 PBS. The slides were blocked with 5% FBS in PBS for 1 hour at room temperature  
589 before surface staining with APC conjugated anti-CD45 (clone 30-F11; Biolegend) for 1  
590 hour at room temperature. The slides were washed with PBS + 5% FBS for 5 minutes at  
591 room temperature for a total of three times before mounting with ProLong Diamond  
592 Antifade Mountant with DAPI (Thermo Fisher). Cells were imaged using a 100X  
593 objective (1.40 NA) on a DeltaVision Elite with the following excitation filter cubes: Cy5  
594 (632/22), GFP (475/28), and DAPI (390/18) and emission cubes: Cy5(679/34), GFP  
595 (525/48), and DAPI (435/48). The entire cell volume was captured using a series of Z-  
596 stack images with a 0.2 $\mu$ m step size. Number of *Mycobacteria* cells per macrophage  
597 were enumerated by manual counting using the Z-stack of images. Representative

598 images were first deconvolved with a theoretical point spread function using SVI  
599 Huygens Essential before a maximum intensity project image was created in Imaris  
600 Image Analysis Software (Bitplane).

601

## 602 **Western Blot**

603 Naïve AMs were isolated by BAL and pooled from 5 mice, plated overnight for  
604 adherence and stimulated for 5 hours with the Nrf2 agonist, dimethyl fumarate (3.65  $\mu$ M;  
605 Sigma-Aldrich) prior to protein collection with RIPA buffer (Cell Signaling Technology)  
606 and HALT protease inhibitor (ThermoFisher). Western blotting analyses were performed  
607 using standard techniques and transblotted onto nitrocellulose membranes. Membranes  
608 were probed with relevant primary antibodies: rabbit anti-Nrf2 (D1Z9C) (1:1000; Cell  
609 Signaling Technology), rabbit anti-mouse beta-actin1-HRP antibody (1:5000, Jackson  
610 Immunoresearch). Primary antibodies were detected by a secondary rat anti-rabbit-HRP  
611 antibody (1:2000, Jackson Immunoresearch).

612

## 613 **Statistical Analyses**

614 RNA-sequencing was analyzed using the edgeR package from Bioconductor.org and  
615 the false discovery rate was computed using the Benjamini-Hochberg algorithm. All  
616 other data are presented as mean  $\pm$  SEM and analyzed by one-way ANOVA (95%  
617 confidence interval) with Dunnett's post-test (for comparison of multiple conditions) or  
618 unpaired Student's t-test (for comparison of two conditions). Statistical analysis and  
619 graphical representation of data was performed using either GraphPad Prism v6.0  
620 software or R. At least 3-5 mice were used per group in each experiment and all

621 experiments were performed at least 2-3 times, as indicated in the figure legends. For  
622 p-values, \*  $p < 0.05$ , \*\*  $p < 0.01$ , \*\*\*  $p < 0.001$ .

623

624

625 **References and Notes:**

- 626 1. S. B. Cohen, B. H. Gern, J. L. Delahaye, K. N. Adams, C. R. Plumlee, J. K.  
627 Winkler, D. R. Sherman, M. Y. Gerner, K. B. Urdahl, Alveolar Macrophages  
628 Provide an Early Mycobacterium tuberculosis Niche and Initiate Dissemination.  
629 *Cell Host Microbe* **24**, 439-446 e434 (2018).
- 630 2. A. J. Wolf, L. Desvignes, B. Linas, N. Banaiee, T. Tamura, K. Takatsu, J. D.  
631 Ernst, Initiation of the adaptive immune response to Mycobacterium tuberculosis  
632 depends on antigen production in the local lymph node, not the lungs. *J Exp Med*  
633 **205**, 105-115 (2008).
- 634 3. A. J. Wolf, B. Linas, G. J. Trevejo-Nunez, E. Kincaid, T. Tamura, K. Takatsu, J.  
635 D. Ernst, Mycobacterium tuberculosis infects dendritic cells with high frequency  
636 and impairs their function in vivo. *J Immunol* **179**, 2509-2519 (2007).
- 637 4. S. Srivastava, J. D. Ernst, Cell-to-cell transfer of M. tuberculosis antigens  
638 optimizes CD4 T cell priming. *Cell Host Microbe* **15**, 741-752 (2014).
- 639 5. W. W. Reiley, M. D. Calayag, S. T. Wittmer, J. L. Huntington, J. E. Pearl, J. J.  
640 Fountain, C. A. Martino, A. D. Roberts, A. M. Cooper, G. M. Winslow, D. L.  
641 Woodland, ESAT-6-specific CD4 T cell responses to aerosol Mycobacterium  
642 tuberculosis infection are initiated in the mediastinal lymph nodes. *Proc Natl*  
643 *Acad Sci U S A* **105**, 10961-10966 (2008).
- 644 6. T. Hussell, T. J. Bell, Alveolar macrophages: plasticity in a tissue-specific  
645 context. *Nat Rev Immunol* **14**, 81-93 (2014).
- 646 7. G. Dranoff, A. D. Crawford, M. Sadelain, B. Ream, A. Rashid, R. T. Bronson, G.  
647 R. Dickersin, C. J. Bachurski, E. L. Mark, J. A. Whitsett, et al., Involvement of  
648 granulocyte-macrophage colony-stimulating factor in pulmonary homeostasis.  
649 *Science* **264**, 713-716 (1994).
- 650 8. M. Guilliams, I. De Kleer, S. Henri, S. Post, L. Vanhoutte, S. De Prijck, K.  
651 Deswarte, B. Malissen, H. Hammad, B. N. Lambrecht, Alveolar macrophages  
652 develop from fetal monocytes that differentiate into long-lived cells in the first  
653 week of life via GM-CSF. *J Exp Med* **210**, 1977-1992 (2013).
- 654 9. B. C. Trapnell, J. A. Whitsett, K. Nakata, Pulmonary alveolar proteinosis. *N Engl*  
655 *J Med* **349**, 2527-2539 (2003).
- 656 10. E. L. Gautier, T. Shay, J. Miller, M. Greter, C. Jakubzick, S. Ivanov, J. Helft, A.  
657 Chow, K. G. Elpek, S. Gordonov, A. R. Mazloom, A. Ma'ayan, W. J. Chua, T. H.  
658 Hansen, S. J. Turley, M. Merad, G. J. Randolph, C. Immunological Genome,  
659 Gene-expression profiles and transcriptional regulatory pathways that underlie  
660 the identity and diversity of mouse tissue macrophages. *Nat Immunol* **13**, 1118-  
661 1128 (2012).

- 662 11. Y. Lavin, D. Winter, R. Blecher-Gonen, E. David, H. Keren-Shaul, M. Merad, S.  
663 Jung, I. Amit, Tissue-resident macrophage enhancer landscapes are shaped by  
664 the local microenvironment. *Cell* **159**, 1312-1326 (2014).
- 665 12. D. Gosselin, V. M. Link, C. E. Romanoski, G. J. Fonseca, D. Z. Eichenfield, N. J.  
666 Spann, J. D. Stender, H. B. Chun, H. Garner, F. Geissmann, C. K. Glass,  
667 Environment drives selection and function of enhancers controlling tissue-specific  
668 macrophage identities. *Cell* **159**, 1327-1340 (2014).
- 669 13. R. J. Snelgrove, J. Goulding, A. M. Didierlaurent, D. Lyonga, S. Vekaria, L.  
670 Edwards, E. Gwyer, J. D. Sedgwick, A. N. Barclay, T. Hussell, A critical function  
671 for CD200 in lung immune homeostasis and the severity of influenza infection.  
672 *Nat Immunol* **9**, 1074-1083 (2008).
- 673 14. M. Brandes, F. Klauschen, S. Kuchen, R. N. Germain, A systems analysis  
674 identifies a feedforward inflammatory circuit leading to lethal influenza infection.  
675 *Cell* **154**, 197-212 (2013).
- 676 15. L. Huang, E. V. Nazarova, S. Tan, Y. Liu, D. G. Russell, Growth of  
677 *Mycobacterium tuberculosis* in vivo segregates with host macrophage  
678 metabolism and ontogeny. *J Exp Med* **215**, 1135-1152 (2018).
- 679 16. S. A. Stanley, J. E. Johndrow, P. Manzanillo, J. S. Cox, The Type I IFN response  
680 to infection with *Mycobacterium tuberculosis* requires ESX-1-mediated secretion  
681 and contributes to pathogenesis. *J Immunol* **178**, 3143-3152 (2007).
- 682 17. K. D. Mayer-Barber, D. L. Barber, K. Shenderov, S. D. White, M. S. Wilson, A.  
683 Cheever, D. Kugler, S. Hieny, P. Caspar, G. Nunez, D. Schlueter, R. A. Flavell,  
684 F. S. Sutterwala, A. Sher, Caspase-1 independent IL-1beta production is critical  
685 for host resistance to *mycobacterium tuberculosis* and does not require TLR  
686 signaling in vivo. *J Immunol* **184**, 3326-3330 (2010).
- 687 18. F. W. McNab, J. Ewbank, R. Rajsbaum, E. Stavropoulos, A. Martirosyan, P. S.  
688 Redford, X. Wu, C. M. Graham, M. Saraiva, P. Tschlis, D. Chaussabel, S. C.  
689 Ley, A. O'Garra, TPL-2-ERK1/2 signaling promotes host resistance against  
690 intracellular bacterial infection by negative regulation of type I IFN production. *J*  
691 *Immunol* **191**, 1732-1743 (2013).
- 692 19. R. O. Watson, S. L. Bell, D. A. MacDuff, J. M. Kimmey, E. J. Diner, J. Olivas, R.  
693 E. Vance, C. L. Stallings, H. W. Virgin, J. S. Cox, The Cytosolic Sensor cGAS  
694 Detects *Mycobacterium tuberculosis* DNA to Induce Type I Interferons and  
695 Activate Autophagy. *Cell Host Microbe* **17**, 811-819 (2015).
- 696 20. A. C. Collins, H. Cai, T. Li, L. H. Franco, X. D. Li, V. R. Nair, C. R. Scharn, C. E.  
697 Stamm, B. Levine, Z. J. Chen, M. U. Shiloh, Cyclic GMP-AMP Synthase Is an  
698 Innate Immune DNA Sensor for *Mycobacterium tuberculosis*. *Cell Host Microbe*  
699 **17**, 820-828 (2015).

- 700 21. J. Keane, M. K. Balcewicz-Sablinska, H. G. Remold, G. L. Chupp, B. B. Meek, M.  
701 J. Fenton, H. Kornfeld, Infection by *Mycobacterium tuberculosis* promotes human  
702 alveolar macrophage apoptosis. *Infect Immun* **65**, 298-304 (1997).
- 703 22. A. O'Garra, P. S. Redford, F. W. McNab, C. I. Bloom, R. J. Wilkinson, M. P.  
704 Berry, The immune response in tuberculosis. *Annu Rev Immunol* **31**, 475-527  
705 (2013).
- 706 23. A. G. Bean, D. R. Roach, H. Briscoe, M. P. France, H. Korner, J. D. Sedgwick,  
707 W. J. Britton, Structural deficiencies in granuloma formation in TNF gene-  
708 targeted mice underlie the heightened susceptibility to aerosol *Mycobacterium*  
709 *tuberculosis* infection, which is not compensated for by lymphotoxin. *J Immunol*  
710 **162**, 3504-3511 (1999).
- 711 24. L. Desvignes, A. J. Wolf, J. D. Ernst, Dynamic roles of type I and type II IFNs in  
712 early infection with *Mycobacterium tuberculosis*. *J Immunol* **188**, 6205-6215  
713 (2012).
- 714 25. C. M. Fremond, D. Togbe, E. Doz, S. Rose, V. Vasseur, I. Maillet, M. Jacobs, B.  
715 Ryffel, V. F. Quesniaux, IL-1 receptor-mediated signal is an essential component  
716 of MyD88-dependent innate response to *Mycobacterium tuberculosis* infection. *J*  
717 *Immunol* **179**, 1178-1189 (2007).
- 718 26. A. V. Misharin, L. Morales-Nebreda, G. M. Mutlu, G. R. Budinger, H. Perlman,  
719 Flow cytometric analysis of macrophages and dendritic cell subsets in the mouse  
720 lung. *Am J Respir Cell Mol Biol* **49**, 503-510 (2013).
- 721 27. M. Kopf, C. Schneider, S. P. Nobs, The development and function of lung-  
722 resident macrophages and dendritic cells. *Nat Immunol* **16**, 36-44 (2015).
- 723 28. C. Gorrini, I. S. Harris, T. W. Mak, Modulation of oxidative stress as an  
724 anticancer strategy. *Nat Rev Drug Discov* **12**, 931-947 (2013).
- 725 29. S. Heinz, C. Benner, N. Spann, E. Bertolino, Y. C. Lin, P. Laslo, J. X. Cheng, C.  
726 Murre, H. Singh, C. K. Glass, Simple combinations of lineage-determining  
727 transcription factors prime cis-regulatory elements required for macrophage and  
728 B cell identities. *Mol Cell* **38**, 576-589 (2010).
- 729 30. S. Dhakshinamoorthy, A. K. Jain, D. A. Bloom, A. K. Jaiswal, Bach1 competes  
730 with Nrf2 leading to negative regulation of the antioxidant response element  
731 (ARE)-mediated NAD(P)H:quinone oxidoreductase 1 gene expression and  
732 induction in response to antioxidants. *J Biol Chem* **280**, 16891-16900 (2005).
- 733 31. A. Otsuki, M. Suzuki, F. Katsuoka, K. Tsuchida, H. Suda, M. Morita, R. Shimizu,  
734 M. Yamamoto, Unique cis-element defined as CsMBE is strictly required for Nrf2-  
735 sMaf heterodimer function in cytoprotection. *Free Radic Biol Med* **91**, 45-57  
736 (2016).



- 737 32. J. Braverman, K. M. Sogi, D. Benjamin, D. K. Nomura, S. A. Stanley, HIF-1alpha  
738 Is an Essential Mediator of IFN-gamma-Dependent Immunity to Mycobacterium  
739 tuberculosis. *J Immunol* **197**, 1287-1297 (2016).
- 740 33. P. S. Manzanillo, M. U. Shiloh, D. A. Portnoy, J. S. Cox, Mycobacterium  
741 tuberculosis activates the DNA-dependent cytosolic surveillance pathway within  
742 macrophages. *Cell Host Microbe* **11**, 469-480 (2012).
- 743 34. R. Wassermann, M. F. Gulen, C. Sala, S. G. Perin, Y. Lou, J. Rybniker, J. L.  
744 Schmid-Burgk, T. Schmidt, V. Hornung, S. T. Cole, A. Ablasser, Mycobacterium  
745 tuberculosis Differentially Activates cGAS- and Inflammasome-Dependent  
746 Intracellular Immune Responses through ESX-1. *Cell Host Microbe* **17**, 799-810  
747 (2015).
- 748 35. A. C. Rothchild, J. R. Sissons, S. Shafiani, C. Plaisier, D. Min, D. Mai, M.  
749 Gilchrist, J. Peschon, R. P. Larson, A. Bergthaler, N. S. Baliga, K. B. Urdahl, A.  
750 Aderem, MiR-155-regulated molecular network orchestrates cell fate in the innate  
751 and adaptive immune response to Mycobacterium tuberculosis. *Proc Natl Acad*  
752 *Sci U S A* **113**, E6172-E6181 (2016).
- 753 36. E. H. Kobayashi, T. Suzuki, R. Funayama, T. Nagashima, M. Hayashi, H. Sekine,  
754 N. Tanaka, T. Moriguchi, H. Motohashi, K. Nakayama, M. Yamamoto, Nrf2  
755 suppresses macrophage inflammatory response by blocking proinflammatory  
756 cytokine transcription. *Nat Commun* **7**, 11624 (2016).
- 757 37. C. L. Abram, G. L. Roberge, Y. Hu, C. A. Lowell, Comparative analysis of the  
758 efficiency and specificity of myeloid-Cre deleting strains using ROSA-EYFP  
759 reporter mice. *J Immunol Methods* **408**, 89-100 (2014).
- 760 38. B. B. Andrade, N. Pavan Kumar, E. P. Amaral, N. Riteau, K. D. Mayer-Barber, K.  
761 W. Tosh, N. Maier, E. L. Conceicao, A. Kubler, R. Sridhar, V. V. Banurekha, M.  
762 S. Jawahar, T. Barbosa, V. C. Manganiello, J. Moss, J. R. Fontana, B. E.  
763 Marciano, E. P. Sampaio, K. N. Olivier, S. M. Holland, S. H. Jackson, M.  
764 Moayeri, S. Leppla, I. Sereti, D. L. Barber, T. B. Nutman, S. Babu, A. Sher, Heme  
765 Oxygenase-1 Regulation of Matrix Metalloproteinase-1 Expression Underlies  
766 Distinct Disease Profiles in Tuberculosis. *J Immunol* **195**, 2763-2773 (2015).
- 767 39. K. C. Chinta, M. A. Rahman, V. Saini, J. N. Glasgow, V. P. Reddy, J. M. Lever,  
768 S. Nhamoyebonde, A. Leslie, R. M. Wells, A. Traylor, R. Madansein, G. P.  
769 Siegal, V. B. Antony, J. Deshane, G. Wells, K. Nargan, J. F. George, P. K.  
770 Ramdial, A. Agarwal, A. J. C. Steyn, Microanatomic Distribution of Myeloid Heme  
771 Oxygenase-1 Protects against Free Radical-Mediated Immunopathology in  
772 Human Tuberculosis. *Cell Rep* **25**, 1938-1952 e1935 (2018).
- 773 40. C. R. Scharn, A. C. Collins, V. R. Nair, C. E. Stamm, D. K. Marciano, E. A.  
774 Graviss, M. U. Shiloh, Heme Oxygenase-1 Regulates Inflammation and  
775 Mycobacterial Survival in Human Macrophages during Mycobacterium  
776 tuberculosis Infection. *J Immunol* **196**, 4641-4649 (2016).

- 777 41. C. E. Stamm, A. C. Collins, M. U. Shiloh, Sensing of Mycobacterium tuberculosis  
778 and consequences to both host and bacillus. *Immunol Rev* **264**, 204-219 (2015).
- 779 42. R. G. Jenner, R. A. Young, Insights into host responses against pathogens from  
780 transcriptional profiling. *Nat Rev Microbiol* **3**, 281-294 (2005).
- 781 43. J. B. Torrelles, L. S. Schlesinger, Integrating Lung Physiology, Immunology, and  
782 Tuberculosis. *Trends Microbiol* **25**, 688-697 (2017).
- 783 44. A. C. Papp, A. K. Azad, M. Pietrzak, A. Williams, S. K. Handelman, R. P. Igo, Jr.,  
784 C. M. Stein, K. Hartmann, L. S. Schlesinger, W. Sadee, AmpliSeq transcriptome  
785 analysis of human alveolar and monocyte-derived macrophages over time in  
786 response to Mycobacterium tuberculosis infection. *PLoS One* **13**, e0198221  
787 (2018).
- 788 45. J. C. Gomez, H. Dang, J. R. Martin, C. M. Doerschuk, Nrf2 Modulates Host  
789 Defense during Streptococcus pneumoniae Pneumonia in Mice. *J Immunol* **197**,  
790 2864-2879 (2016).
- 791 46. J. Athale, A. Ulrich, N. C. MacGarvey, R. R. Bartz, K. E. Welty-Wolf, H. B.  
792 Suliman, C. A. Piantadosi, Nrf2 promotes alveolar mitochondrial biogenesis and  
793 resolution of lung injury in Staphylococcus aureus pneumonia in mice. *Free*  
794 *Radic Biol Med* **53**, 1584-1594 (2012).
- 795 47. N. M. Reddy, S. R. Kleeberger, T. W. Kensler, M. Yamamoto, P. M. Hassoun, S.  
796 P. Reddy, Disruption of Nrf2 impairs the resolution of hyperoxia-induced acute  
797 lung injury and inflammation in mice. *J Immunol* **182**, 7264-7271 (2009).
- 798 48. A. Page, V. A. Volchkova, S. P. Reid, M. Mateo, A. Bagnaud-Baule, K. Nemirov,  
799 A. C. Shurtleff, P. Lawrence, O. Reynard, M. Ottmann, V. Lotteau, S. S. Biswal,  
800 R. K. Thimmulappa, S. Bavari, V. E. Volchkov, Marburgvirus hijacks nrf2-  
801 dependent pathway by targeting nrf2-negative regulator keap1. *Cell Rep* **6**, 1026-  
802 1036 (2014).
- 803 49. M. R. Edwards, B. Johnson, C. E. Mire, W. Xu, R. S. Shabman, L. N. Speller, D.  
804 W. Leung, T. W. Geisbert, G. K. Amarasinghe, C. F. Basler, The Marburg virus  
805 VP24 protein interacts with Keap1 to activate the cytoprotective antioxidant  
806 response pathway. *Cell Rep* **6**, 1017-1025 (2014).
- 807 50. H. Y. Cho, F. Imani, L. Miller-DeGraff, D. Walters, G. A. Melendi, M. Yamamoto,  
808 F. P. Polack, S. R. Kleeberger, Antiviral activity of Nrf2 in a murine model of  
809 respiratory syncytial virus disease. *Am J Respir Crit Care Med* **179**, 138-150  
810 (2009).
- 811 51. A. A. Lugade, R. R. Vethanayagam, M. Nasirikenari, P. N. Bogner, B. H. Segal,  
812 Y. Thanavala, Nrf2 regulates chronic lung inflammation and B-cell responses to  
813 nontypeable Haemophilus influenzae. *Am J Respir Cell Mol Biol* **45**, 557-565  
814 (2011).

- 815 52. A. Boutten, D. Goven, E. Artaud-Macari, J. Boczkowski, M. Bonay, NRF2  
816 targeting: a promising therapeutic strategy in chronic obstructive pulmonary  
817 disease. *Trends in molecular medicine* **17**, 363-371 (2011).
- 818 53. T. Rangasamy, C. Y. Cho, R. K. Thimmulappa, L. Zhen, S. S. Srisuma, T. W.  
819 Kensler, M. Yamamoto, I. Petrache, R. M. Tuder, S. Biswal, Genetic ablation of  
820 Nrf2 enhances susceptibility to cigarette smoke-induced emphysema in mice.  
821 *The Journal of clinical investigation* **114**, 1248-1259 (2004).
- 822 54. S. Shang, D. Ordway, M. Henao-Tamayo, X. Bai, R. Oberley-Deegan, C.  
823 Shanley, I. M. Orme, S. Case, M. Minor, D. Ackart, L. Hascall-Dove, A. R.  
824 Ovrutsky, P. Kandasamy, D. R. Voelker, C. Lambert, B. M. Freed, M. D. Iseman,  
825 R. J. Basaraba, E. D. Chan, Cigarette smoke increases susceptibility to  
826 tuberculosis--evidence from in vivo and in vitro models. *The Journal of infectious*  
827 *diseases* **203**, 1240-1248 (2011).
- 828 55. S. B. Gordon, N. G. Bruce, J. Grigg, P. L. Hibberd, O. P. Kurmi, K. B. Lam, K.  
829 Mortimer, K. P. Asante, K. Balakrishnan, J. Balmes, N. Bar-Zeev, M. N. Bates, P.  
830 N. Breyse, S. Buist, Z. Chen, D. Havens, D. Jack, S. Jindal, H. Kan, S. Mehta,  
831 P. Moschovis, L. Naeher, A. Patel, R. Perez-Padilla, D. Pope, J. Rylance, S.  
832 Semple, W. J. Martin, 2nd, Respiratory risks from household air pollution in low  
833 and middle income countries. *The Lancet. Respiratory medicine* **2**, 823-860  
834 (2014).
- 835 56. E. J. R. Peterson, R. Bailo, A. C. Rothchild, M. Arrieta-Ortiz, A. Kaur, M. Pan, D.  
836 Mai, C. Cooper, A. Aderem, A. Bhatt, N. Baliga, An essential mycolate  
837 remodeling program for mycobacterial adaptation in host cells. *bioRxiv* 354431;  
838 doi: <https://doi.org/10.1101/354431>.
- 839 57. J. V. Price, R. E. Vance, The macrophage paradox. *Immunity* **41**, 685-693  
840 (2014).
- 841 58. E. Kaufmann, J. Sanz, J. L. Dunn, N. Khan, L. E. Mendonca, A. Pacis, F.  
842 Tzelepis, E. Pernet, A. Dumaine, J. C. Grenier, F. Mailhot-Leonard, E. Ahmed, J.  
843 Belle, R. Besla, B. Mazer, I. L. King, A. Nijnik, C. S. Robbins, L. B. Barreiro, M.  
844 Divangahi, BCG Educates Hematopoietic Stem Cells to Generate Protective  
845 Innate Immunity against Tuberculosis. *Cell* **172**, 176-190 e119 (2018).
- 846 59. R. J. W. Arts, S. Moorlag, B. Novakovic, Y. Li, S. Y. Wang, M. Oosting, V. Kumar,  
847 R. J. Xavier, C. Wijmenga, L. A. B. Joosten, C. Reusken, C. S. Benn, P. Aaby, M.  
848 P. Koopmans, H. G. Stunnenberg, R. van Crevel, M. G. Netea, BCG Vaccination  
849 Protects against Experimental Viral Infection in Humans through the Induction of  
850 Cytokines Associated with Trained Immunity. *Cell Host Microbe* **23**, 89-100 e105  
851 (2018).
- 852 60. Y. Yao, M. Jeyanathan, S. Haddadi, N. G. Barra, M. Vaseghi-Shanjani, D.  
853 Damjanovic, R. Lai, S. Afkhami, Y. Chen, A. Dvorkin-Gheva, C. S. Robbins, J. D.  
854 Schertzer, Z. Xing, Induction of Autonomous Memory Alveolar Macrophages

855 Requires T Cell Help and Is Critical to Trained Immunity. *Cell* **175**, 1634-1650  
856 e1617 (2018).

857 61. S. Shafiani, G. Tucker-Heard, A. Kariyone, K. Takatsu, K. B. Urdahl, Pathogen-  
858 specific regulatory T cells delay the arrival of effector T cells in the lung during  
859 early tuberculosis. *J Exp Med* **207**, 1409-1420 (2010).

860 62. A. Liberzon, C. Birger, H. Thorvaldsdottir, M. Ghandi, J. P. Mesirov, P. Tamayo,  
861 The Molecular Signatures Database (MSigDB) hallmark gene set collection. *Cell*  
862 *Syst* **1**, 417-425 (2015).

863 63. A. Subramanian, P. Tamayo, V. K. Mootha, S. Mukherjee, B. L. Ebert, M. A.  
864 Gillette, A. Paulovich, S. L. Pomeroy, T. R. Golub, E. S. Lander, J. P. Mesirov,  
865 Gene set enrichment analysis: a knowledge-based approach for interpreting  
866 genome-wide expression profiles. *Proc Natl Acad Sci U S A* **102**, 15545-15550  
867 (2005).  
868

869 **Acknowledgements:** We thank the staff at Seattle Children's Research Institute  
870 vivarium for animal care, Pamela Troisch and the Next Gen Sequencing core at the  
871 Institute for Systems Biology, and Chris Sassetti and Christina Baer at the University of  
872 Massachusetts Medical School for the mEmerald bacterial strains. Members of the  
873 Urdahl lab provided helpful discussions. **Funding:** This work was supported by National  
874 Institute of Allergy and Infectious Disease of the National Institute of Health under  
875 Awards U19AI106761 (A.A.) and U19AI135976 (A.A.). **Author contributions:** A.C.R.,  
876 G.S.O., J.N., A.H.D., and A.A. designed the experiments. A.C.R., D.M., G.S.O, and J.N.  
877 conducted the experiments. L.M.A. and A.H.D. performed computational analyses.  
878 A.C.R., A.H.D., E.S.G., and A.A. wrote the paper. **Competing interests:** The authors  
879 declare no competing interests. **Data and materials availability:** Raw and processed  
880 RNA-sequencing data can be accessed from the National Center for Biotechnology  
881 Information (NCBI) Gene Expression Omnibus (GEO) database under accession  
882 number [GSE: holder until GEO submission]. [Submission pending.]

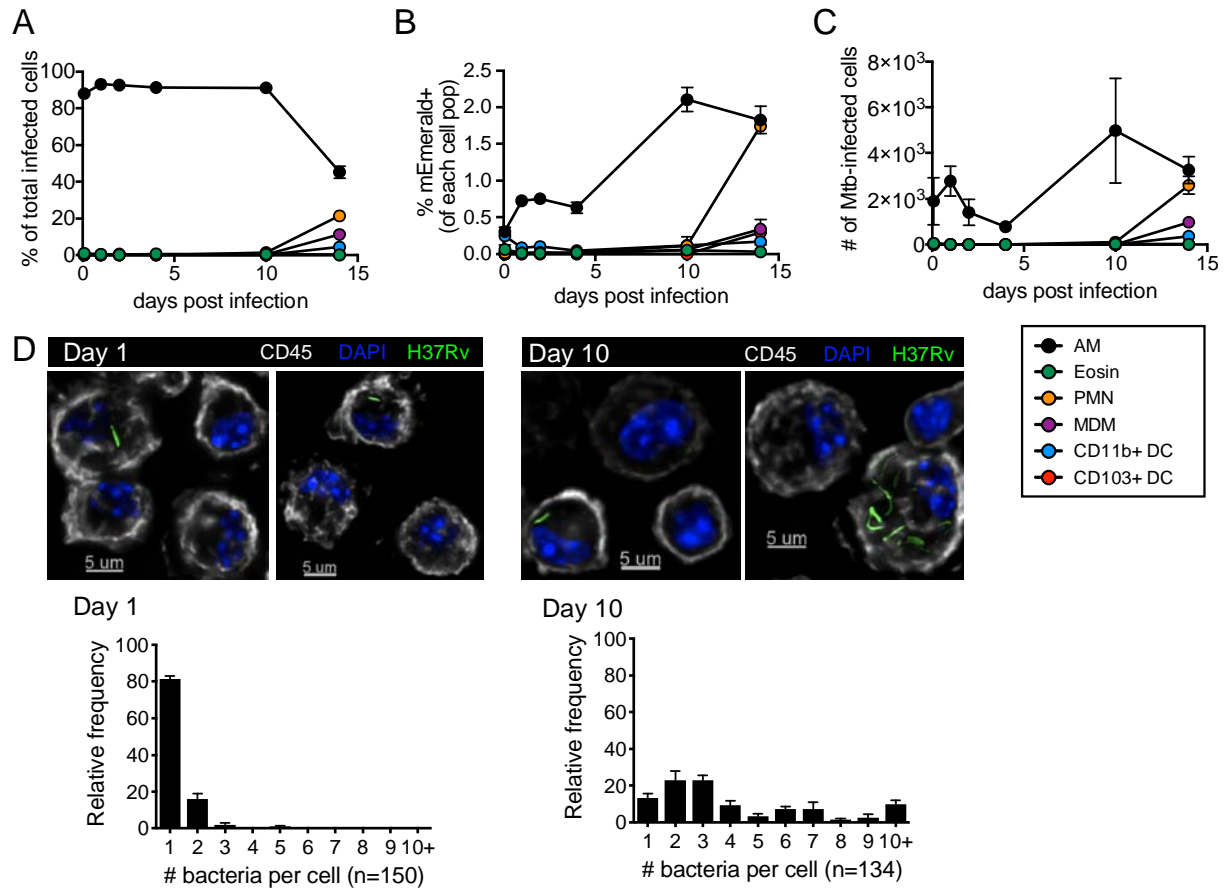

**Figure 1: Alveolar macrophages are the first cells infected by Mtb after aerosol infection.** (A) % of total infected cells, (B) % mEmerald<sup>+</sup> for each cell population, and (C) total number of Mtb-infected cells in the lung between 2 hours and 14 days after high dose aerosol infection with mEmerald-tagged H37Rv (n = 3 mice/time point). (D) Microscopy of BAL samples 1 and 10 days after high dose aerosol infection with mEmerald-tagged H37Rv and quantitation of bacteria per AM (n = 3 replicates/time point, each replicate was pooled from 3 mice). *Abbreviations: AM = alveolar macrophages, PMN = neutrophils, Eosin = eosinophils, MDM = myeloid-derived macrophages, DC = dendritic cells.* Data are presented as mean ± SEM. Data is representative of 2 independent experiments.

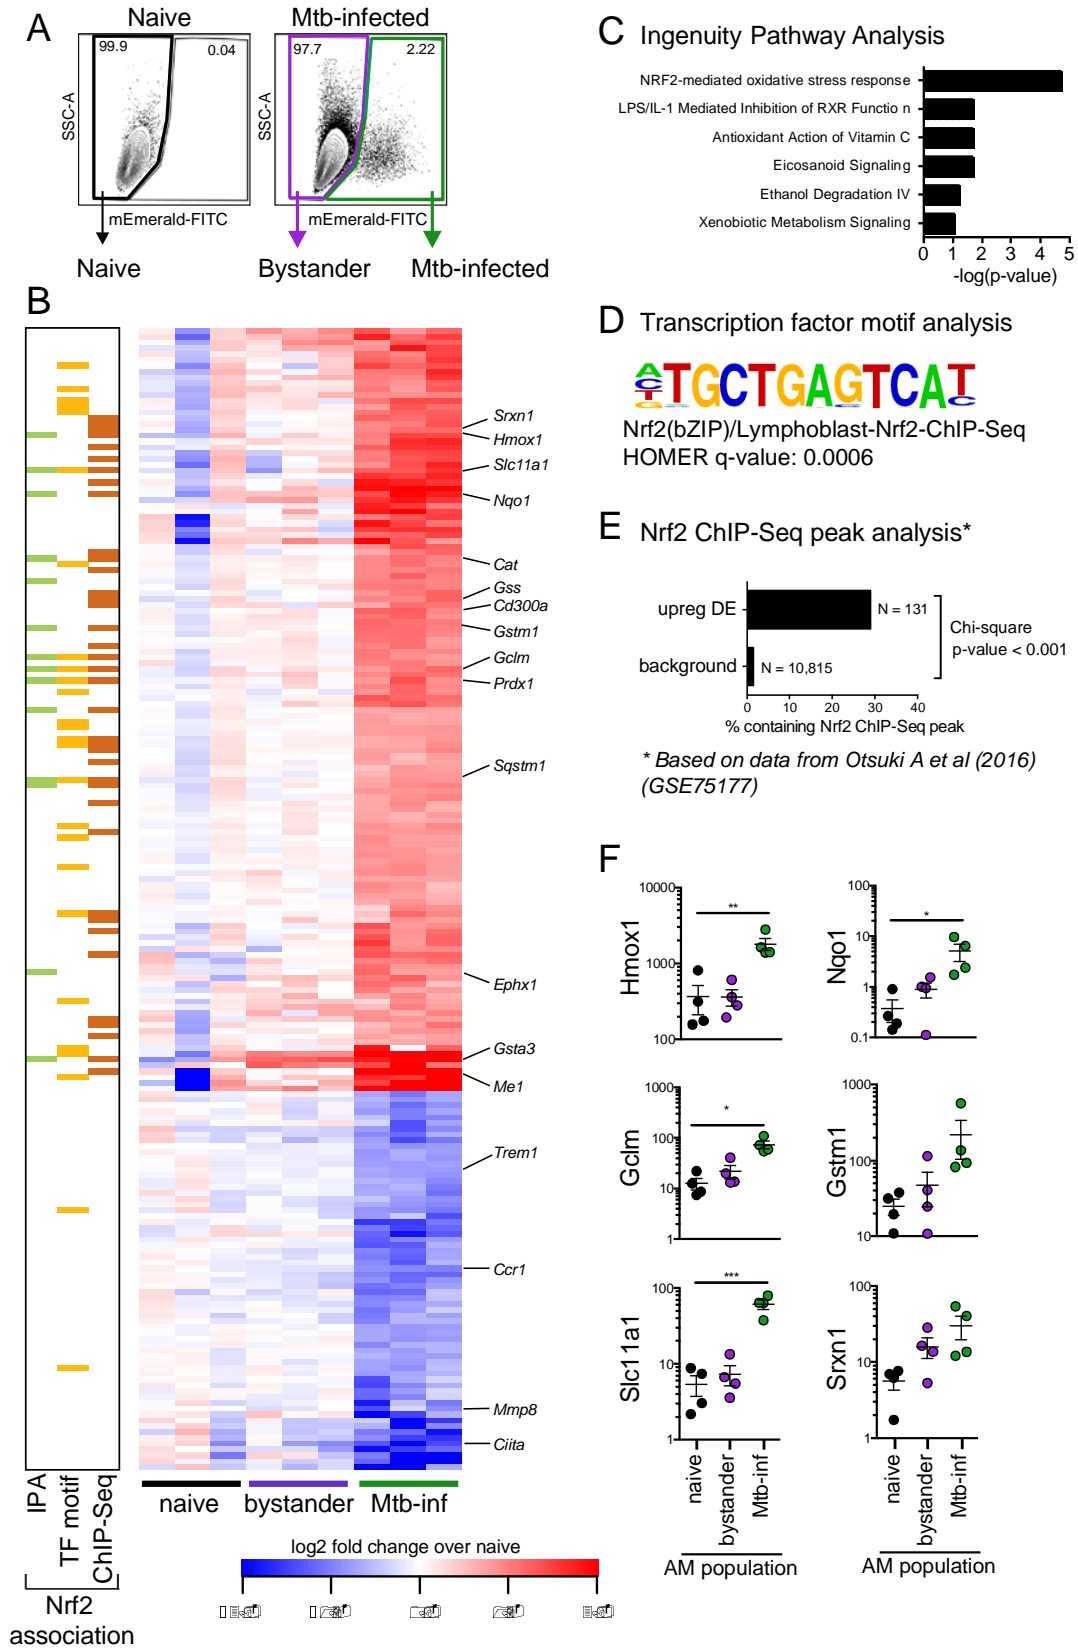



**Figure 2: Mtb-infected alveolar macrophages up-regulate an Nrf2-associated antioxidant gene signature.** (A) Gating scheme to sort naïve, bystander, and Mtb-infected AMs from bronchoalveolar lavage (BAL) samples after high dose aerosol infection with mEmerald-tagged H37Rv. (B) Heatmap of gene expression ( $\log_2$  fold change over average of naïve AMs) for 196 differentially expressed genes between naïve and Mtb-infected AMs (Filtering criteria: average CPM >1, |fold change| > 2 and FDR < 0.01, Benjamini-Hochberg calculated). Columns are independent experiments (pooled mice) and rows are genes. Genes called out are known Nrf2 target genes of interest as well as downregulated pro-inflammatory genes. Colored bars to the left indicate Nrf2 association as determined by 3 different methods: (C) Ingenuity Pathway Analysis, (D) transcription factor promoter binding motif enrichment analysis (HOMER), and (E) ChIP-seq peak analysis. (F) RT-qPCR validation of Nrf2 associated genes for naïve, bystander and Mtb-infected AMs 24 hours post-infection. Values are relative to Ef1a. Data is presented from 3 independent experiments. Data are presented as mean  $\pm$  SEM with one-way ANOVA with Dunnett's post-test \* $p$  < 0.05, \*\* $p$  < 0.01, \*\*\* $p$  < 0.001.

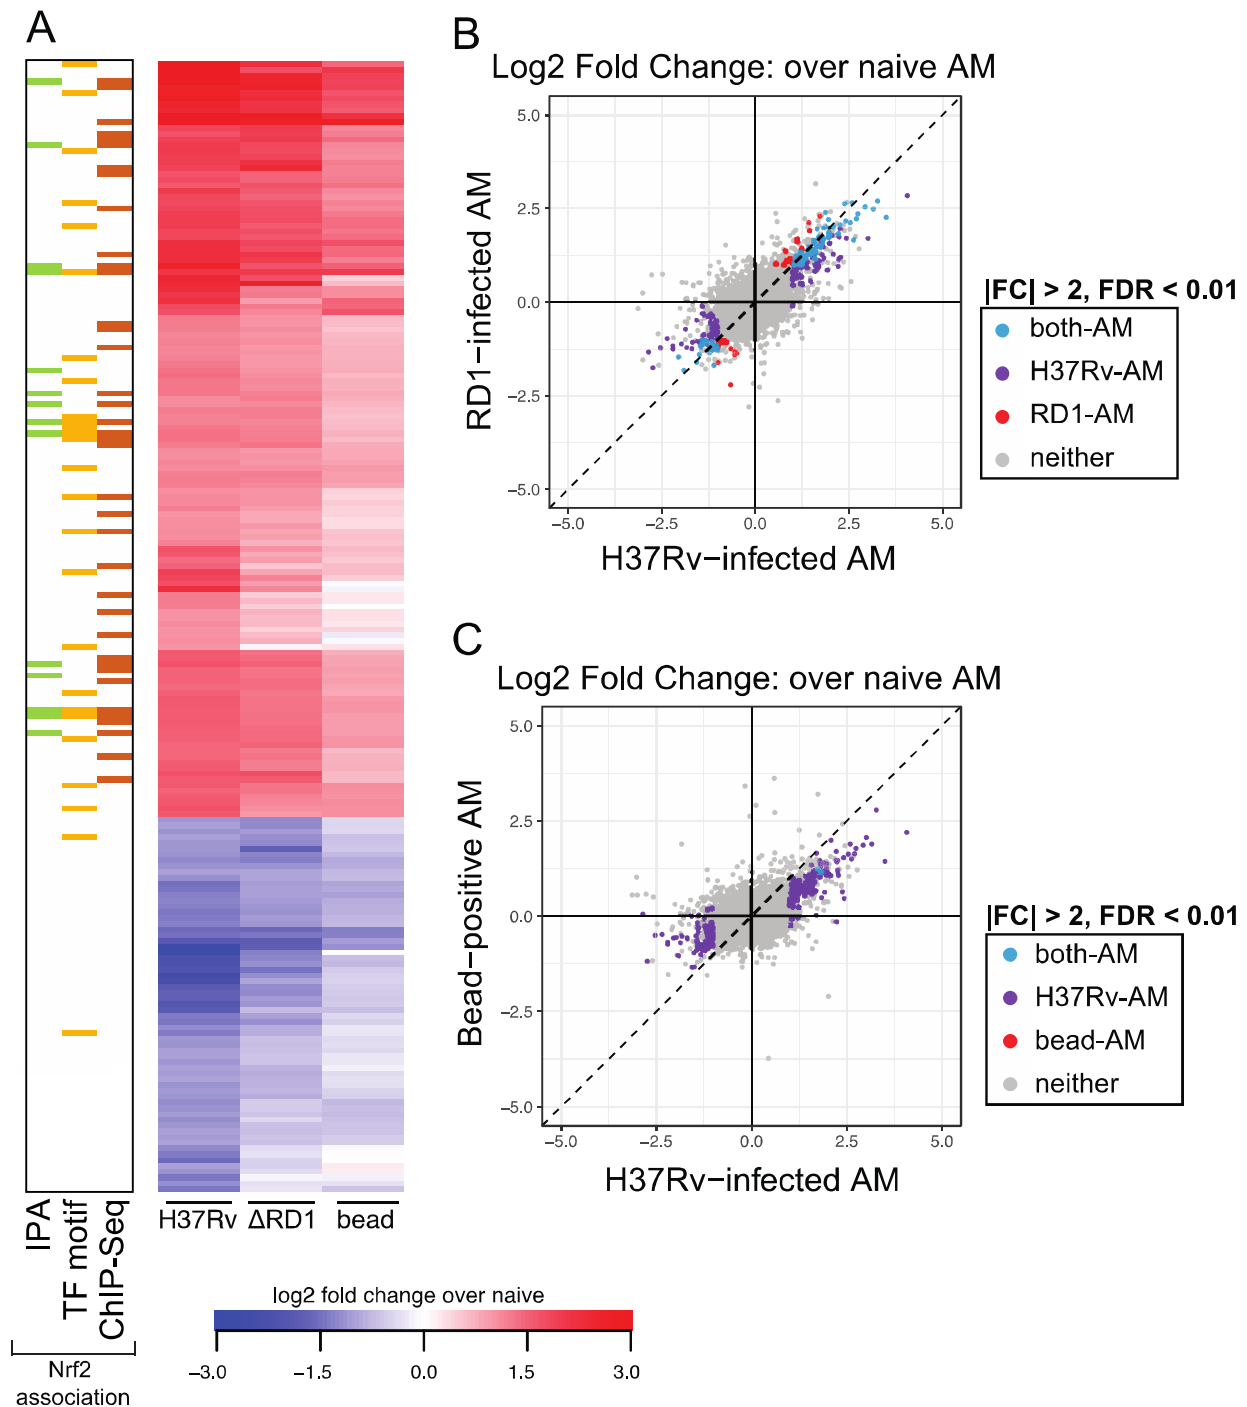

**Figure 3**



**Figure 3: Up-regulation of Nrf2-associated signature does not require virulent Mtb infection.** (A) Heatmap of  $\log_2$  fold change gene expression over average of naïve AMs for H37Rv-infected,  $\Delta$ RD1-infected, and bead-positive AMs 24 hours after treatment. Columns represent averages of 3 independent experiments. Rows represent 196 DE genes described in *Figure 2*. Colored bars to the left indicate Nrf2 association as described in *Figure 2*. (B, C) Scatterplots comparing gene expression values ( $\log_2$  fold change over average of naïve AMs) for H37Rv-infected versus  $\Delta$ RD1-infected AMs (B) or H37Rv-infected versus bead-positive AMs (C) 24 hours post-infection with significant differentially expressed genes highlighted (average CPM >1, |fold change| > 2 and FDR < 0.01, Benjamini-Hochberg calculated). Data is presented from 3 independent experiments.

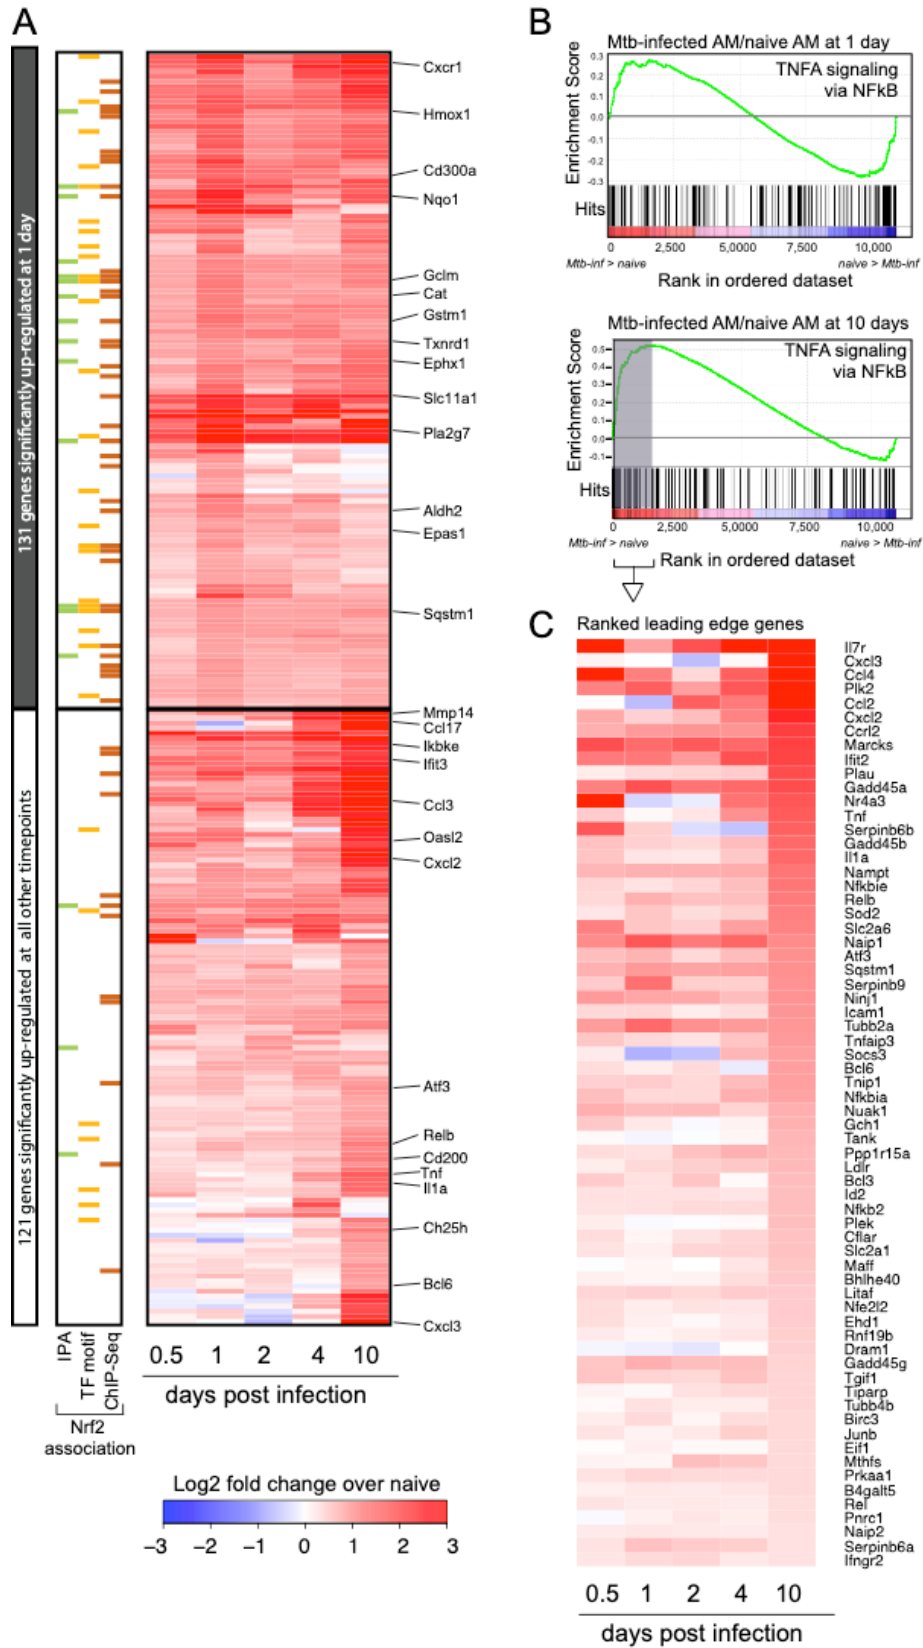

Figure 4

**Figure 4: Over the first 10 days of infection, expression of Nrf2-associated genes is sustained and expression of pro-inflammatory genes is delayed in Mtb-infected alveolar macrophages.** (A) Heatmap of gene expression ( $\log_2$  fold change over naïve AMs) for 252 genes up-regulated in Mtb-infected AMs compared to naïve AMs for at least one out of five time points (Filtering criteria: average CPM >1, |fold change| > 2 and FDR < 0.01, Benjamini-Hochberg calculated). Top 131 genes are significantly up-regulated in Mtb-infected AMs at 1 day post-infection. Bottom 121 genes are not significantly up-regulated in Mtb-infected AMs at 1 day post-infection. Colored bars indicate Nrf2 association as described in *Figure 2*. (B, C) Gene set enrichment analysis and top 50 ranked leading edge genes in the “TNFA signaling via NFkB” pathway for Mtb-infected AMs at 10 days post-infection. Data is presented from 3 independent experiments per time point.

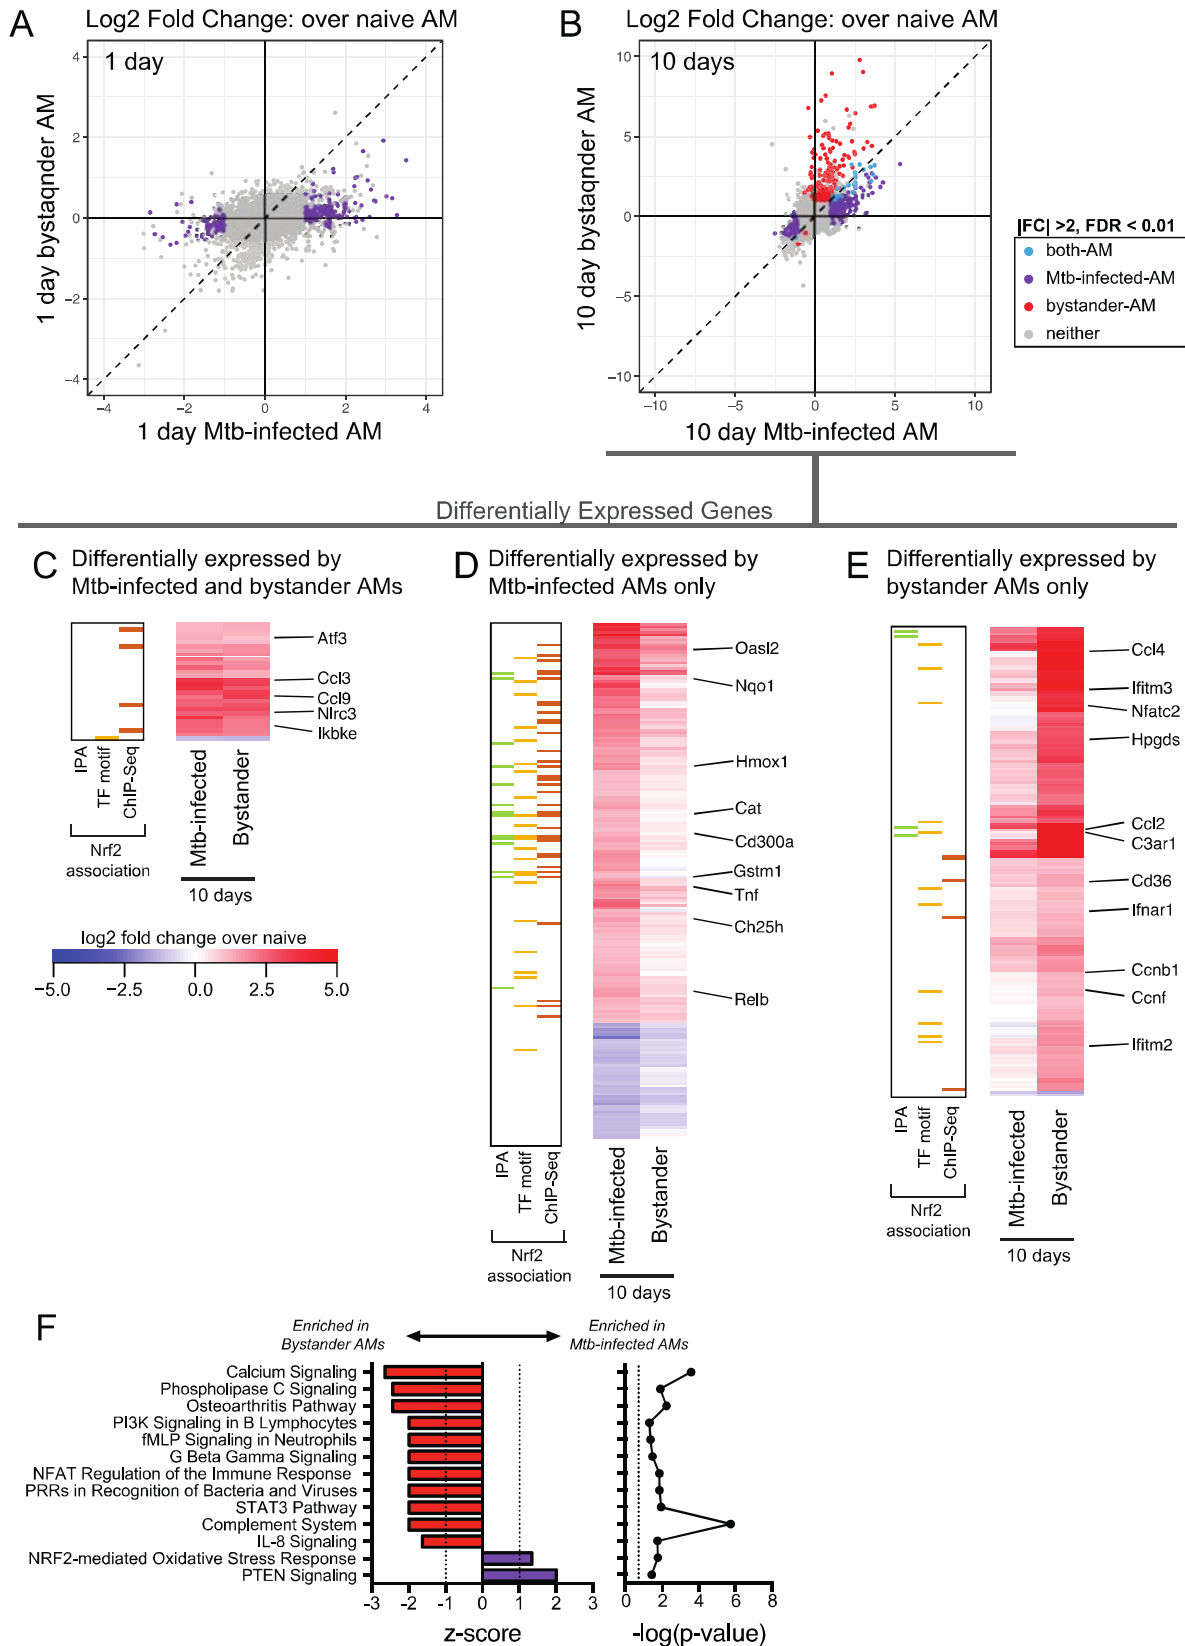

**Figure 5**

**Figure 5: Bystander AMs express a unique transcriptional signature 10 days after infection.** (A, B) Scatterplots comparing gene expression values ( $\log_2$  fold change over average of naïve AMs) for H37Rv-infected versus bystander AMs at 1 day (A) and 10 days (B) post-infection with significant differentially expressed genes highlighted ( $|\text{fold change}| > 2$  and  $\text{FDR} < 0.01$ , Benjamini-Hochberg calculated). Data is presented from 3 independent experiments. (C, D, E) Heatmaps of  $\log_2$  fold change gene expression at 10 days over average of naïve AMs. Colored bars indicate Nrf2 association as described in *Figure 2*. (C) 28 genes differentially expressed by both bystander and Mtb-infected AMs. (D) 200 genes differentially expressed only by Mtb-infected AMs. (E) 177 genes differentially expressed only by bystander AMs. Columns represent the average of three independent experiments. Genes of interest noted to the right. (F) Ingenuity Pathway Analysis comparing gene expression from bystander AMs and Mtb-infected AMs. Canonical pathways with  $|\text{z-scores}| > 1$  and  $\text{p-values} < 0.05$  were reported.

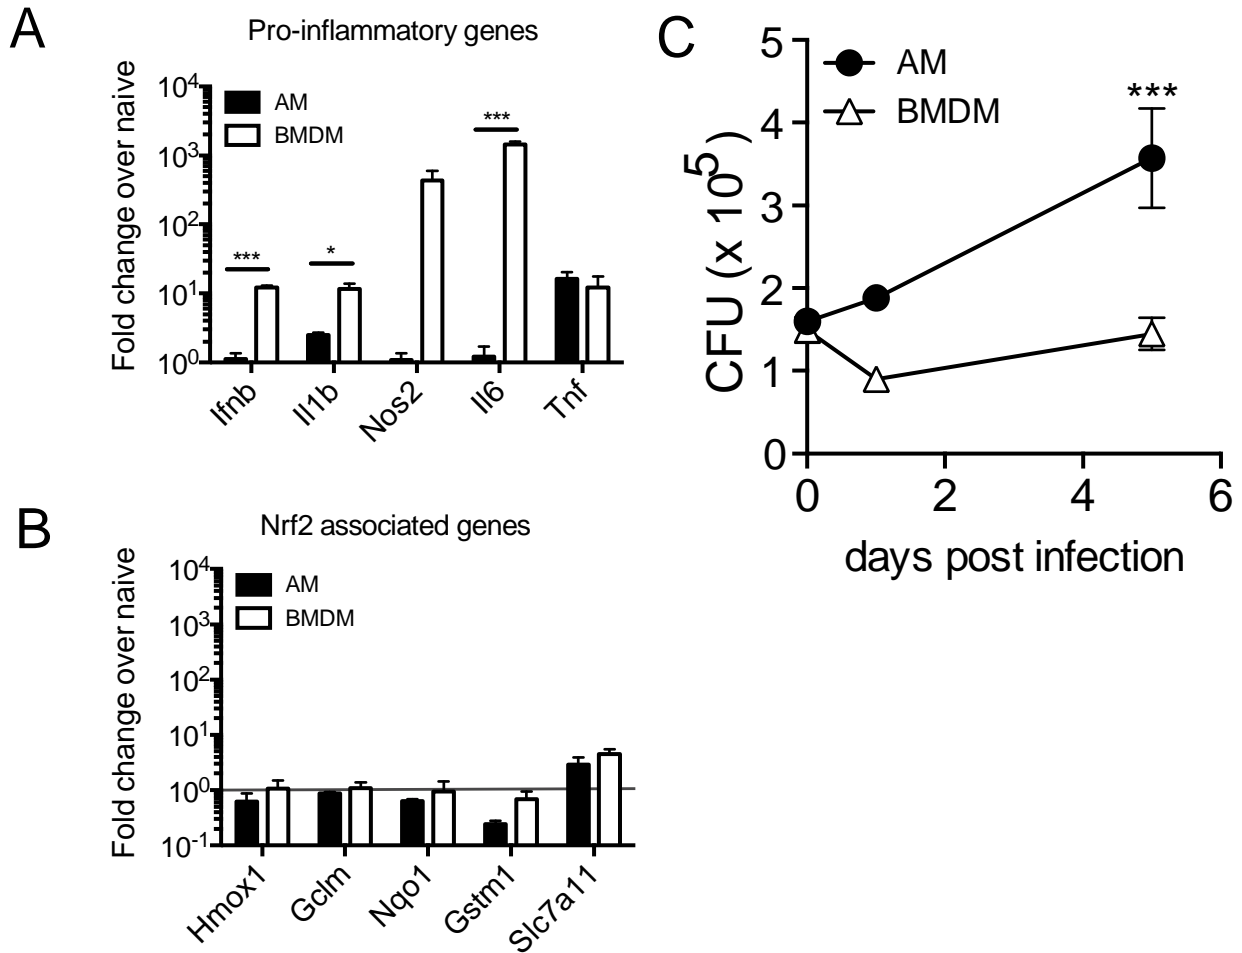

**Figure 6: The alveolar macrophage response to Mtb is driven by both cell type and environment.** *In vitro* H37Rv infection of AMs and bone marrow derived macrophages (BMDMs). (A) RT-qPCR gene expression analysis of pro-inflammatory genes 8 hours post-infection. (B) RT-qPCR analysis of Nrf2-associated genes 8 hours post-infection. (C) Colony forming unit (CFU) assay to measure bacterial burden in each cell type over 5 days. Data is representative of 3 independent experiments with three technical replicates each. Multiple t-tests with Holm-Sidak correction. \* $p < 0.05$ , \*\*\* $p < 0.001$

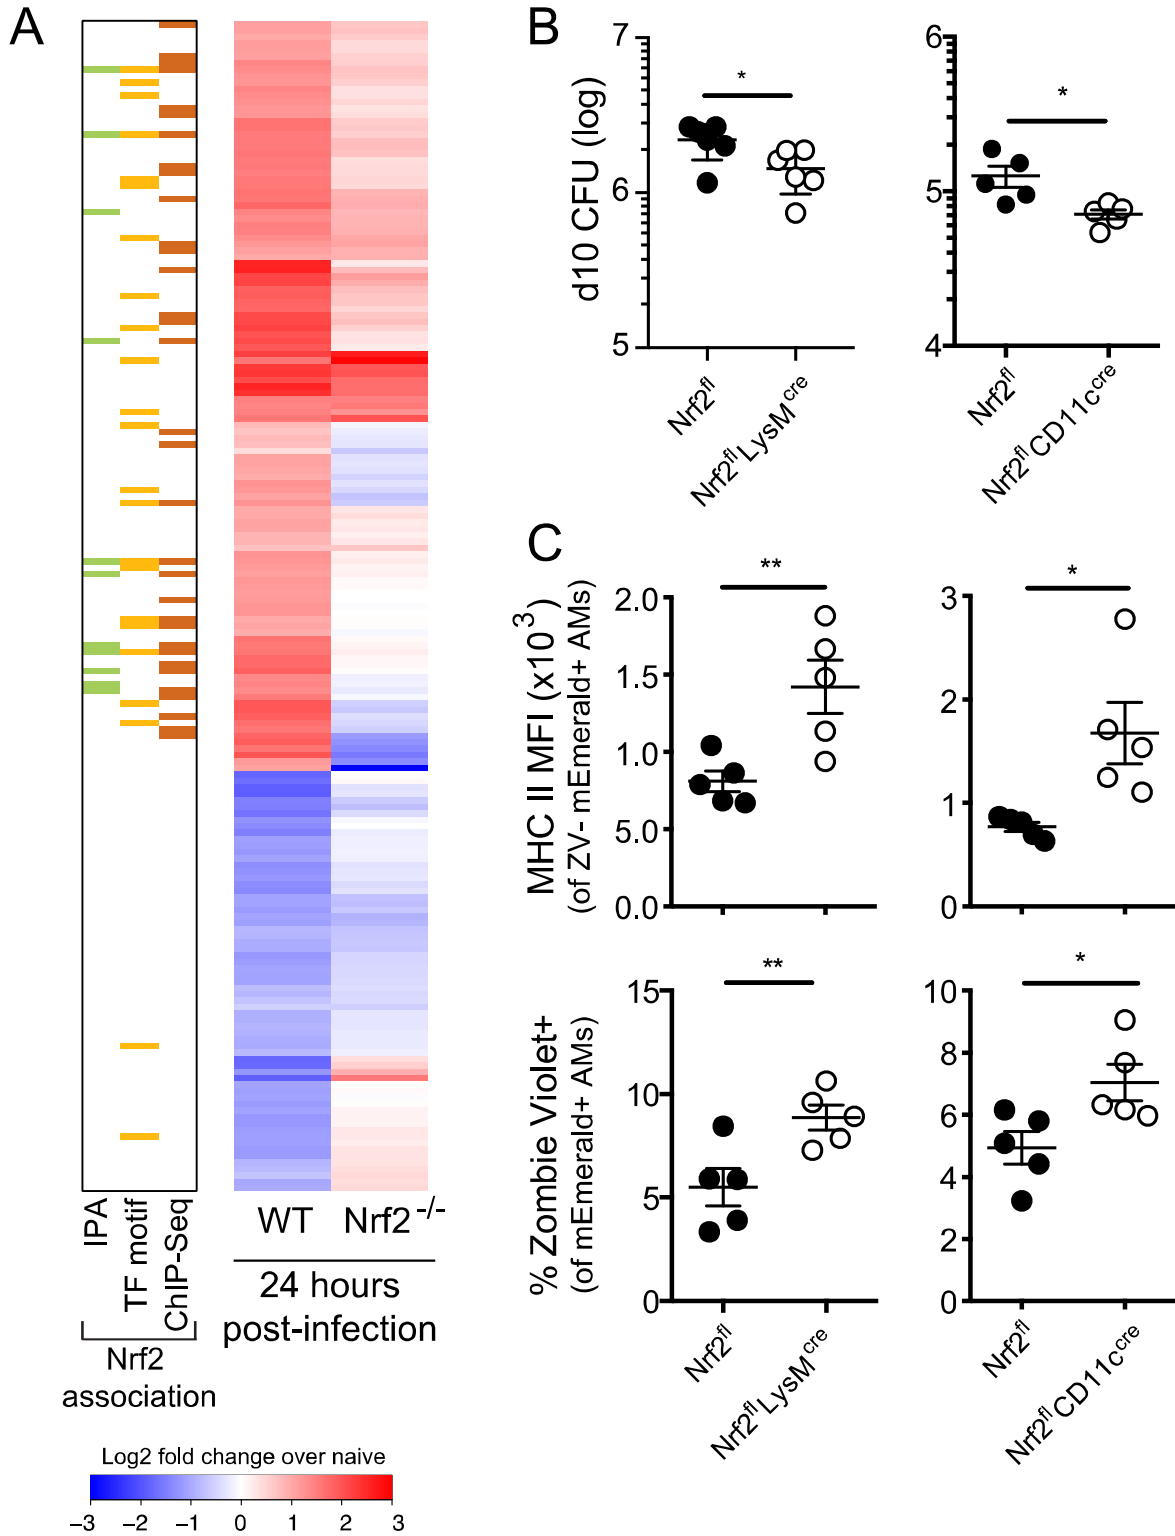

**Figure 7**

**Figure 7: Modulation of Nrf2 activity alters macrophage response and control of Mtb.** (A) Heatmap of gene expression ( $\log_2$  fold change over average of respective naïve AMs) for WT and Nrf2<sup>-/-</sup> Mtb-infected AMs, averaged from at least two independent experiments. Rows depict the 196 differentially expressed genes between naïve and Mtb-infected WT AMs as shown in *Figure 2B*. Colored bars indicate Nrf2 association as described in *Figure 2*. (B) Lung bacterial burden measured by CFU assay at 10 days post-infection with low dose H37Rv from Nrf2<sup>fl</sup>LysM<sup>cre</sup>, Nrf2<sup>fl</sup>CD11c<sup>cre</sup> and their respective Nrf2<sup>fl</sup> littermate controls. (C) MHC II MFI of live Mtb-infected AMs (*top*) and % dead (Zombie Violet Viability Dye<sup>+</sup>) of Mtb-infected AMs (*bottom*) as measured by flow cytometry at 10 days post-infection with high dose mEmerald-H37Rv from Nrf2<sup>fl</sup>LysM<sup>cre</sup>, Nrf2<sup>fl</sup>CD11c<sup>cre</sup> and their respective Nrf2<sup>fl</sup> littermate controls. Data is presented from 2 independent experiments (A) or representative of 2 independent experiments with 5 mice/group (B-C). Two-tailed unpaired Student's t-test \* p < 0.05, \*\* p < 0.01.



## Supplementary Materials

Fig. S1. Lung flow cytometry gating scheme for detection of Mtb infected cells

Fig. S2. Gene expression heatmaps of naïve, bystander and Mtb-infected alveolar macrophages 24 hours post-infection

Fig. S3. Gating strategy for sorting of  $\Delta$ RD1-infected AMs and bead-positive AMs

Fig. S4. Gene expression heatmaps of Mtb-infected alveolar macrophages 0.5, 1, 2, 4 and 10 days after aerosol infection

Fig. S5. Nrf2 Western Blot for alveolar macrophages from Nrf2<sup>fl</sup>LysM<sup>cre</sup>, Nrf2<sup>fl</sup> CD11c<sup>cre</sup>, Nrf2<sup>fl</sup> littermate controls, WT and Nrf2<sup>-/-</sup> mice

Table S1. Ingenuity Pathway Analysis and HOMER results tables

Table S2: RNA-Sequencing data for WT AMs

Table S3: RNA-Sequencing data for Nrf2<sup>-/-</sup> AMs
